# Supplementary material
Source: PubMed Central journal article supplement (PMC3031758)
Supplement: NIHMS260167-supplement-1_si_001.pdf [file NIHMS260167-supplement-1_si_001.pdf]

# Histone Deacetylase Inhibitors as a Tool to Up-regulate New Fungal Biosynthetic Products - Isolation of EGM-556, a Cyclodepsipeptide, from *Microascus* sp.

Hélène C. Vervoort, Marija Drašković and Phillip Crews\*

Department of Chemistry and Biochemistry, University of California, Santa Cruz, California 95064.

[phil@chemistry.ucsc.edu](mailto:phil@chemistry.ucsc.edu)

|                                                                                                                                                                                                                                | Page: |
|--------------------------------------------------------------------------------------------------------------------------------------------------------------------------------------------------------------------------------|-------|
| Table of Contents.                                                                                                                                                                                                             | S1    |
| General Experimental Procedures.                                                                                                                                                                                               | S2    |
| Identification of Fungal Strain 098059A.                                                                                                                                                                                       | S2    |
| <b>Figure S1.</b> <sup>1</sup> H NMR spectrum of EGM-556 ( <b>1</b> ), (600 MHz, DMSO- <i>d</i> <sub>6</sub> ).                                                                                                                | S6    |
| <b>Figure S1a.</b> Expanded regions of the <sup>1</sup> H NMR spectrum of EGM-556 ( <b>1</b> ), (600 MHz, DMSO- <i>d</i> <sub>6</sub> ).                                                                                       | S7    |
| <b>Figure S2.</b> <sup>13</sup> C NMR spectrum of EGM-556 ( <b>1</b> ), (150 MHz, DMSO- <i>d</i> <sub>6</sub> ).                                                                                                               | S8    |
| <b>Figure S3.</b> DEPT NMR spectrum of EGM-556 ( <b>1</b> ), (150 MHz, DMSO- <i>d</i> <sub>6</sub> ).                                                                                                                          | S9    |
| <b>Figure S4.</b> <sup>1</sup> H - <sup>1</sup> H COSY spectrum of EGM-556 ( <b>1</b> ), (600 MHz, DMSO- <i>d</i> <sub>6</sub> ).                                                                                              | S10   |
| <b>Figure S5.</b> gHMQC spectrum of EGM-556 ( <b>1</b> ), (600 MHz, DMSO- <i>d</i> <sub>6</sub> ).                                                                                                                             | S11   |
| <b>Figure S6.</b> gHMBC spectrum of EGM-556 ( <b>1</b> ), (600 MHz, DMSO- <i>d</i> <sub>6</sub> ).                                                                                                                             | S12   |
| <b>Figure S7.</b> <sup>1</sup> H NMR spectrum of acyclic methyl ester ( <b>2</b> ), (600 MHz, DMSO- <i>d</i> <sub>6</sub> ).                                                                                                   | S13   |
| <b>Figure S8.</b> <sup>13</sup> C NMR spectrum of Linear EGM-556 ( <b>2</b> ), (150 MHz, DMSO- <i>d</i> <sub>6</sub> ).                                                                                                        | S14   |
| <b>Figure S9.</b> DEPT NMR spectrum of Linear EGM-556 ( <b>2</b> ), (150 MHz, DMSO- <i>d</i> <sub>6</sub> ).                                                                                                                   | S15   |
| <b>Figure S10.</b> <sup>1</sup> H - <sup>1</sup> H COSY spectrum of Linear EGM-556 ( <b>2</b> ), (600 MHz, DMSO- <i>d</i> <sub>6</sub> ).                                                                                      | S16   |
| <b>Figure S11.</b> gHMQC spectrum of Linear EGM-556 ( <b>2</b> ), (600 MHz, DMSO- <i>d</i> <sub>6</sub> ).                                                                                                                     | S17   |
| <b>Figure S12.</b> gHMBC spectrum of Linear EGM-556 ( <b>2</b> ), (600 MHz, DMSO- <i>d</i> <sub>6</sub> ).                                                                                                                     | S18   |
| <b>Figure S13.</b> RP C18 LC-ELSD-MS traces of EGM-556 ( <b>1</b> ) hydrolysate (solid line) and comparison to free amino acids (dashed line) derivatized with Marfey's reagent (FDDA).                                        | S19   |
| <b>Figure S14.</b> Chiral separation of (2 <i>S</i> , 3 <i>S</i> )-isoleucine and (2 <i>R</i> , 3 <i>S</i> )-isoleucine and comparison with the hydrolysate of EGM-556 ( <b>1</b> ), derivatized with Marfey's reagent (FDDA). | S19   |
| <b>Table S1.</b> Fungal strains used in epigenetic experiments.                                                                                                                                                                | S2    |
| <b>Table S2.</b> BLASTn results of rDNA sequences obtained after genomic DNA extraction and PCR on fungal strain 098059A using indicated primers.                                                                              | S4    |
| <b>Table S3.</b> NMR Assignments for EGM-556 ( <b>1</b> ) in DMSO- <i>d</i> <sub>6</sub> at 600/150 MHz                                                                                                                        | S18   |
| <b>Table S4.</b> NMR Assignments for Acyclic Methyl Ester ( <b>2</b> ) in DMSO- <i>d</i> <sub>6</sub> at 600/150 MHz                                                                                                           | S19   |

## General Experimental Procedures.

Optical rotations were obtained on a digital polarimeter (Jasco P-2000). NMR spectra were recorded in DMSO-*d*<sub>6</sub> on a 500 MHz Unity Inova (125 MHz for carbon spectra) and a Unity Inova 600 MHz for all proton-detected experiments. LC-ELSD-MS analyses were carried out on a 4.6 x 150mm luna 5 $\mu$  column (Phenomenex) equipped with S.e.d.e.r.e (France) Sedex 55 ELSD detector, a Waters 996 Photodiode Array Detector and a Mariner Biospectrometry Workstation mass spectrometer. To obtain high-resolution analysis for accurate mass determination of EGM-556, two references were used for calibration purposes: Pravastatin Sodium (Mw 446.5 Da) and Etoposide (Mw 588.6 Da). To determine the accurate mass of acyclic methyl ester **2**, Pravastatin Sodium and Rifampicin (Mw 822.9 Da) were used as calibration standards.

Table S1 shows the fungal strains used for epigenetic manipulation experiments. Each strain was cultured 166 mL Dzapek-Dox/artificial seawater media in the presence of 10<sup>-4</sup> M SAHA, which was added after 24 hrs of growth, as well as grown in a control culture treated with 200  $\mu$ L DMSO only. Cultures were allowed to grow for 17 subsequent days. Culture broths, including the mycelia were homogenized and exhaustively extracted with 200 mL ethyl acetate (3 times) and evaporated to dryness. The crude extracts were analyzed by LC-ELSD-MS at 5mg/ml.

The crude extract of fungal strain 098059A was taken to semi-preparative reversed phase C18 HPLC using 50% acetonitrile in water as eluent. Under these conditions EGM-556 eludes at ~30 min.

**Table S1. Fungal strains used in epigenetic experiments**

| Entry # | Strain # | Strain ID                       | Observations <sup>a</sup> |
|---------|----------|---------------------------------|---------------------------|
| 1       | 098008A  |                                 | B                         |
| 2       | 098046C  | <i>Penicillium griseofulvum</i> | D <sup>c</sup>            |
| 3       | 098049A  |                                 | B                         |
| 4       | 098059A  | <i>Microascus</i> sp.           | C                         |
| 5       | 098060A  |                                 | A                         |
| 6       | 098065A  |                                 | A                         |
| 7       | 098069A  |                                 | B                         |
| 8       | 098070A  |                                 | B                         |
| 9       | 098076A  | identical/related to 098065A    | A                         |
| 10      | 098078A  |                                 | B                         |
| 11      | 098079A  |                                 | A                         |
| 12      | 098079B  | identical/related to 098065A    | A                         |

<sup>a</sup> Legend to Observations: A: No significant change in metabolome. B: Significant change in metabolome, Mw < 300Da. C: New metabolites observed, Mw > 300Da. D: Known metabolites disappeared. <sup>b</sup> Identification based on chemistry produced: griseofulvin, dechlorogriseofulvin. <sup>c</sup> Known metabolites: griseofulvin, dechlorogriseofulvin.

## Identification of Fungal Strain 098059A.

The fungal strain was identified by means of morphological studies and genetic studies. *Microascus* species are usually identified based upon their sexual fruiting structure (teleomorph). Strain 098059A failed to form sexual structures under laboratory conditions and was first described as a *Scopulariopsis* anamorph (asexual form). However, genetic identification using isolated genomic DNA and PCR using three rDNA primer sets (U1/U2 (28S subunit), ITS-1/ITS-4 (ITS region) and NL-1/NL-4 (D1/D2 region)) indicated that strain 098059A was most closely identified to *Microascus* sp, in particular *M. trigonosporous*. The following primers were used for PCR:

U1: 5'-GTGAAATTGTTGAAAGGGAA-3'

U2: 5'-GACTCCTTGGTCCGTGTT-3'

ITS-1: 5'-TCCGTAGGTGAACCTGCGG-3'

ITS-4: 5'-TCCTCCGCTTATTGATATGC-3'

NL-4: 5'-GGTCCGTGTTTCAAGACGG-3'

NL-1: 5'-GCATATCAATAAGCGGAGGAAAAG-3'

The following sequences were obtained by PCR:

U1/U2, forward:

ATGCGCCGGTCCGANAGCCGTCGCTTGC GGCGGTGCACTCCGGCGGGCTCGGGCCAGCATCAGTTC  
NCCTCGGGGGGAGAAAGGCGGCAGGAATGTGGCTCTTCGGAGTGTTATAGCCTGCCGTATAATACCC  
CCGGCGGACTGAGGACCGCGCGTATGCAAGGATGCTGGCGTAATGGTCGTCAGCGACCCGTCTTG  
AAACACGGACCCAAGGAGTCAA

U1/U2, reverse:

GCCGCATCCTTGCATACGCGCGGTCTCAGTTCGCCCGGGGGTATTATACGGCAGGCTATANCACTC  
CAAGAGCCACATTCCTGCCGCTTTCTCCCCCGAGGCGAACTGATGCTGGCCCCGAGCCCGCCGGA  
GTGCACCGCCGCAAGCGACGGCTGATCCGACGGGCGCGAGTCTGGTCGCAAGCGCTTCCCTTTNAA  
CAATTTCAAA

ITS-1/ITS-4 (ITS region):

TCCGTAGGAACCAGCGGAGGGATCATTACGGAAGTTACTCTTCATACCCTTTTGTGAACACTACCCC  
ATTGCCGCGGTTGCCTCGGCGGGGAGGTCTGGGGGGTTGCGCTCCGGCGCTCCCCCGGGCCCCC  
GCCGGCCGCGCCGAACTCTTCATTTGCAAAGCGGACTGTACGATCTGATTATATCTTGAAAAACAAG  
TCAAACCTTTCAACAACGGATCTCTGGTTCTGGCATCGATGAAGAACGCAGCGAAATGCGATAAGT  
AATGTGAATTGCAGAATTCAGTGAATCATCGAATCTTTGAACGCACATTGCGCCCCGGCAGCAATCTG  
CCGGGCATGCCTGTCCGAGCGTCATTTCTGCCCTCGAGCGCGGTTCCGGCCCCTAGCGGGCCGGCCGC  
CGCCCGGTGTTGGGGCGCTGCGGGCCCTCGTGCCCGCAGGCCCTGAAATGAAGTGGCGGTCCC GCC  
GCGGCGCCCCCTGCGTAGTAGTAAAGCACCTCGCATCGGGTCCC GGCGGAGGCCAGCCGTGCAACC  
TCTCTTTTGATGGTTTGACCTCGGATCAGGTAGGGTTACCCGCTGAACTTAAGCATATCAATAAGCGG  
AGGA

NL-1/NL-4 (D1/D2 region):

GCATATCAATAAGCGGAGGAAAAGAAACCAACAGGGATTGCCCCAGTAACGGCGAGTGAAGCGGC  
AACAGCTCAAATTTGAAATCTGGTCCCCCGCGGGGCCGAGTTGTAATTTGAAGAGGATGCTTCTG  
GCAAGGTGCCGTCCGAGTTCCTTGAACGGGACGCCCGAGAGGGTGAGAGCCCCGTACGGTCGGA  
CGCCGAGCCTCTGTGAAGCTCCTTCGACGAGTCGAGTAGTTTGGGAATGCTGCTCAAATGGGAGG  
TAAACCCCTTCTAAAGCTAAATACCGGCCAGAGACCGATAGCGCACAAGTAGAGTGATCGAAAGAT  
GAAAAGCACTTTGAAAAGAGAGTTAAAAAGCACGTGAAATTGTTGAAAGGGAAGCGCTTGCGACC  
AGACTCGCGCCCGTCGGATCAGCCGTCGCTCGTCGGCGGCGCACTCCGGCGGGCTCGGGCCAGCAT  
CAGTTCGCCTCGGGGGGAGAAAGGCGGCGGGAATGTGGCTCTACGGAGTGTTATAGCCCCGCCGCT  
AATACCCCGGGCGGACTGAGGACCGCGCGTATGCAAGGATGCTGGCGTAATGGTCGTCAGCGACC  
CGTCTTGAAACACGGACC

**Table S2. BLASTn results of rDNA sequences obtained after genomic DNA extraction and PCR on fungal strain 098059A using indicated primers.**

**Primers Used: U1 and U2, forward sequence**

| Accession  | Description                                                                                          | Max score | Total score | Query coverage | E value  | Max ident |
|------------|------------------------------------------------------------------------------------------------------|-----------|-------------|----------------|----------|-----------|
| AF400878.1 | Scopulariopsis croci large subunit ribosomal RNA gene, partial sequence                              | 322       | 322         | 80.00%         | 6.00E-85 | 98.00%    |
| AF400870.1 | Microascus trigonosporus large subunit ribosomal RNA gene, partial sequence                          | 337       | 337         | 91.00%         | 2.00E-89 | 96.00%    |
| AF400853.1 | Kernia hyalina large subunit ribosomal RNA gene, partial sequence                                    | 337       | 337         | 91.00%         | 2.00E-89 | 96.00%    |
| DQ470958.1 | Microascus trigonosporus isolate AFTOL-ID 914 28S large subunit ribosomal RNA gene, partial sequence | 357       | 357         | 98.00%         | 2.00E-95 | 95.00%    |
| U26854.1   | Scopulariopsis brumptii isolate 2-89 28S rRNA gene, partial sequence                                 | 315       | 315         | 89.00%         | 9.00E-83 | 95.00%    |
| AF400864.1 | Microascus griseus large subunit ribosomal RNA gene, partial sequence                                | 326       | 326         | 93.00%         | 4.00E-86 | 94.00%    |
| AF400881.1 | Scopulariopsis hibernica large subunit ribosomal RNA gene, partial sequence                          | 324       | 324         | 93.00%         | 2.00E-85 | 94.00%    |
| AF400859.1 | Microascus cinereus large subunit ribosomal RNA gene, partial sequence                               | 324       | 324         | 92.00%         | 2.00E-85 | 94.00%    |
| AF400867.1 | Microascus senegalensis large subunit ribosomal RNA gene, partial sequence                           | 320       | 320         | 92.00%         | 2.00E-84 | 94.00%    |
| AB566305.1 | Microascus sp. IFM 59326 gene for large subunit ribosomal RNA, partial sequence, strain: IFM 59326   | 322       | 322         | 94.00%         | 6.00E-85 | 94.00%    |

**Primers Used: U-1 and U-2, reverse sequence**

| Accession  | Description                                                                                          | Max score | Total score | Query coverage | E value  | Max ident |
|------------|------------------------------------------------------------------------------------------------------|-----------|-------------|----------------|----------|-----------|
| AF400878.1 | Scopulariopsis croci large subunit ribosomal RNA gene, partial sequence                              | 363       | 363         | 99.00%         | 3.00E-97 | 97.00%    |
| AF400870.1 | Microascus trigonosporus large subunit ribosomal RNA gene, partial sequence                          | 337       | 337         | 99.00%         | 2.00E-89 | 95.00%    |
| AF400853.1 | Kernia hyalina large subunit ribosomal RNA gene, partial sequence                                    | 337       | 337         | 99.00%         | 2.00E-89 | 95.00%    |
| DQ470958.1 | Microascus trigonosporus isolate AFTOL-ID 914 28S large subunit ribosomal RNA gene, partial sequence | 333       | 333         | 99.00%         | 2.00E-88 | 94.00%    |
| AF400859.1 | Microascus cinereus large subunit ribosomal RNA gene, partial sequence                               | 320       | 320         | 99.00%         | 2.00E-84 | 93.00%    |
| AF400867.1 | Microascus senegalensis large subunit ribosomal RNA gene, partial sequence                           | 318       | 318         | 99.00%         | 7.00E-84 | 93.00%    |
| U26854.1   | Scopulariopsis brumptii isolate 2-89 28S rRNA gene, partial sequence                                 | 272       | 272         | 85.00%         | 5.00E-70 | 93.00%    |
| AF400864.1 | Microascus griseus large subunit ribosomal RNA gene, partial sequence                                | 316       | 316         | 99.00%         | 2.00E-83 | 93.00%    |
| U47835.1   | Microascus trigonosporus large subunit ribosomal RNA gene, partial sequence                          | 313       | 313         | 99.00%         | 3.00E-82 | 92.00%    |
| AB566305.1 | Microascus sp. IFM 59326 gene for large subunit ribosomal RNA, partial sequence, strain: IFM 59326   | 309       | 309         | 99.00%         | 4.00E-81 | 92.00%    |

**Primers Used: ITS-1 and ITS-4**

| Accession  | Description                                                                                                                                                                                                                        | Max score | Total score | Query coverage | E value  | Max ident |
|------------|------------------------------------------------------------------------------------------------------------------------------------------------------------------------------------------------------------------------------------|-----------|-------------|----------------|----------|-----------|
| GQ120995.1 | Fungal endophyte isolate 282C 18S ribosomal RNA gene, partial sequence; internal transcribed spacer 1, 5.8S ribosomal RNA gene, and internal transcribed spacer 2, complete sequence; and 28S ribosomal RNA gene, partial sequence | 1077      | 1077        | 98.00%         | 0.00E+00 | 99.00%    |
| DQ491513.1 | Microascus trigonosporus isolate AFTOL-ID 914 internal transcribed spacer 1, partial sequence; 5.8S ribosomal RNA gene, complete sequence; and internal transcribed spacer 2, partial sequence                                     | 872       | 872         | 83.00%         | 0.00E+00 | 97.00%    |

|            |                                                                                                                                                                                                                                        |     |     |         |          |        |
|------------|----------------------------------------------------------------------------------------------------------------------------------------------------------------------------------------------------------------------------------------|-----|-----|---------|----------|--------|
| AM774156.1 | Microascus trigonosporus var. trigonosporus 18S rRNA gene (partial), ITS1, 5.8S rRNA gene, ITS2 and 28S rRNA gene (partial), strain CBS 665.71                                                                                         | 983 | 983 | 96.00%  | 0.00E+00 | 97.00% |
| FJ713076.1 | Microascus trigonosporus var. trigonosporus isolate R9(9) internal transcribed spacer 1, partial sequence; 5.8S ribosomal RNA gene, complete sequence; and internal transcribed spacer 2, partial sequence                             | 959 | 959 | 94.00%  | 0.00E+00 | 96.00% |
| FJ713095.1 | Scopulariopsis chartarum isolate LB3A internal transcribed spacer 1, partial sequence; 5.8S ribosomal RNA gene, complete sequence; and internal transcribed spacer 2, partial sequence                                                 | 953 | 953 | 93.00%  | 0.00E+00 | 96.00% |
| AY625066.1 | Scopulariopsis chartarum strain ATCC 16279 18S ribosomal RNA gene, partial sequence; int transcr spacer 1, 5.8S ribosomal RNA gene, and int transcr spacer 2, complete sequence; and 28S ribosomal RNA gene, partial sequence          | 904 | 904 | 95.00%  | 0.00E+00 | 94.00% |
| FJ914669.1 | Graphium dubautiae strain HSAUP042788 18S ribosomal RNA gene, partial sequence; int transcr spacer 1, 5.8S ribosomal RNA gene, and int transcr spacer 2, complete sequence; and 28S ribosomal RNA gene, partial sequence               | 937 | 937 | 100.00% | 0.00E+00 | 94.00% |
| GU056013.1 | Uncultured Hypocreales isolate 31 18S ribosomal RNA gene, partial sequence; internal transcribed spacer 1, 5.8S ribosomal RNA gene, and internal transcribed spacer 2, complete sequence; and 28S ribosomal RNA gene, partial sequence | 915 | 915 | 98.00%  | 0.00E+00 | 94.00% |
| AM774160.1 | Scopulariopsis chartarum ITS1, 5.8S rRNA gene, ITS2 and 28S rRNA gene (partial), strain FMR 3997                                                                                                                                       | 856 | 856 | 93.00%  | 0.00E+00 | 93.00% |
| FJ946484.1 | Scopulariopsis hibernica 18S ribosomal RNA gene, partial sequence; internal transcribed spacer 1, 5.8S ribosomal RNA gene, and internal transcribed spacer 2, complete sequence; and 28S ribosomal RNA gene, partial sequence          | 898 | 898 | 100.00% | 0.00E+00 | 93.00% |

**Primers Used: NL-1 and NL-4**

| Accession  | Description                                                                                          | Max score | Total score | Query coverage | E value  | Max ident |
|------------|------------------------------------------------------------------------------------------------------|-----------|-------------|----------------|----------|-----------|
| AF275539.1 | Microascus cirrosus large subunit ribosomal RNA gene, partial sequence                               | 1050      | 1050        | 94.00%         | 0.00E+00 | 99.00%    |
| U47835.1   | Microascus trigonosporus large subunit ribosomal RNA gene, partial sequence                          | 1083      | 1083        | 99.00%         | 0.00E+00 | 98.00%    |
| AB566305.1 | Microascus sp. IFM 59326 gene for large subunit ribosomal RNA, partial sequence, strain: IFM 59326   | 1040      | 1040        | 96.00%         | 0.00E+00 | 98.00%    |
| AB470531.1 | Microascus sp. 795_2_CY01 gene for 28S rRNA, partial sequence                                        | 953       | 953         | 91.00%         | 0.00E+00 | 97.00%    |
| AF275541.1 | Pseudallescheria africana large subunit ribosomal RNA gene, partial sequence                         | 942       | 942         | 94.00%         | 0.00E+00 | 96.00%    |
| AB363754.1 | Scopulariopsis brevicaulis gene for large subunit rRNA, partial sequence, strain: IFM 54315          | 998       | 998         | 100.00%        | 0.00E+00 | 96.00%    |
| DQ470958.1 | Microascus trigonosporus isolate AFTOL-ID 914 28S large subunit ribosomal RNA gene, partial sequence | 880       | 880         | 85.00%         | 0.00E+00 | 96.00%    |
| AY494711.1 | Scopulariopsis flava large subunit ribosomal RNA gene, partial sequence                              | 867       | 867         | 87.00%         | 0.00E+00 | 96.00%    |
| AB297478.1 | Scopulariopsis brevicaulis gene for large subunit ribosomal RNA, partial sequence                    | 992       | 992         | 100.00%        | 0.00E+00 | 96.00%    |

**Figure S1.**  $^1\text{H}$  NMR spectrum of EGM-556 (**1**), (600 MHz,  $\text{DMSO-}d_6$ )

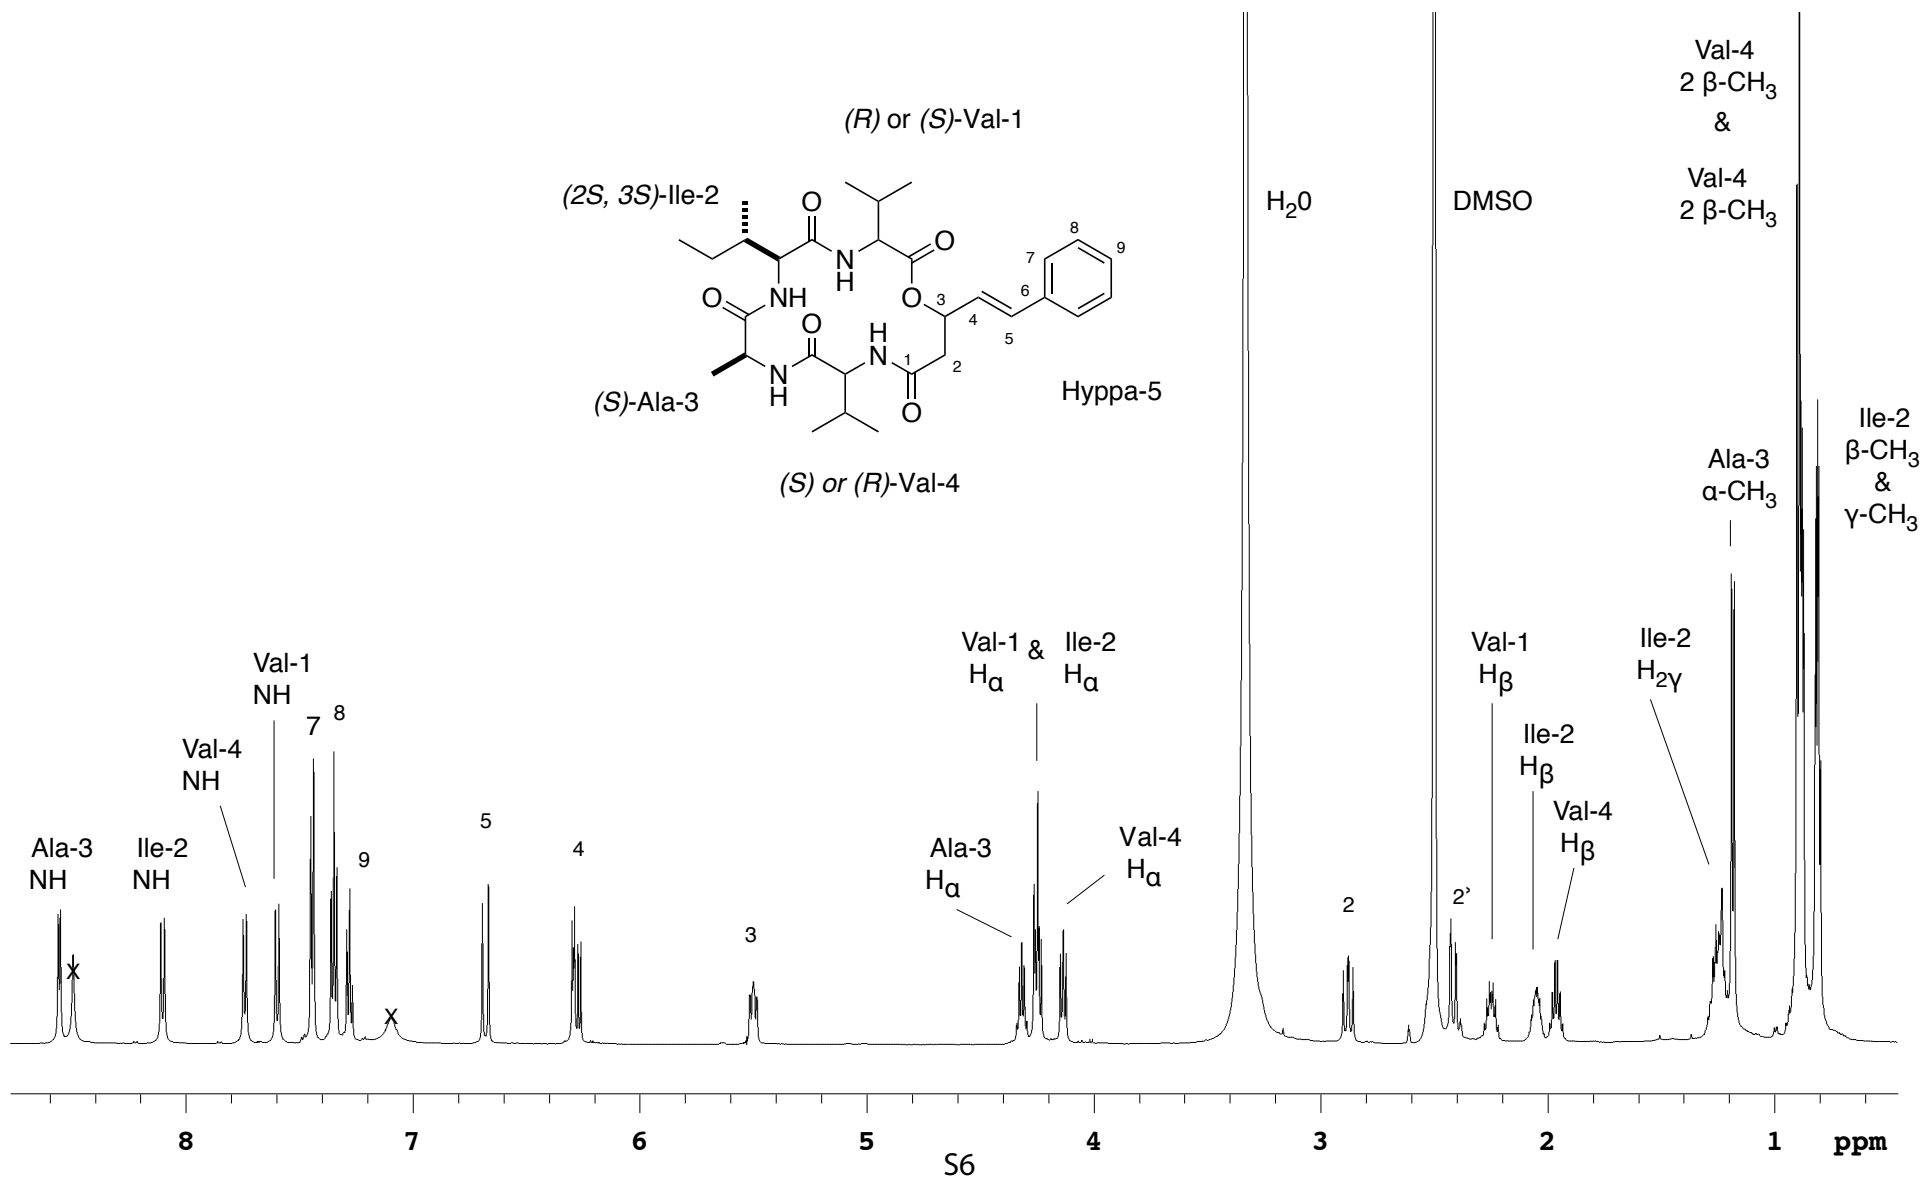

**Figure S1a** . Expanded regions of the  $^1\text{H}$  NMR spectrum of EGM-556 (**1**), (600 MHz,  $\text{DMSO-}d_6$ )

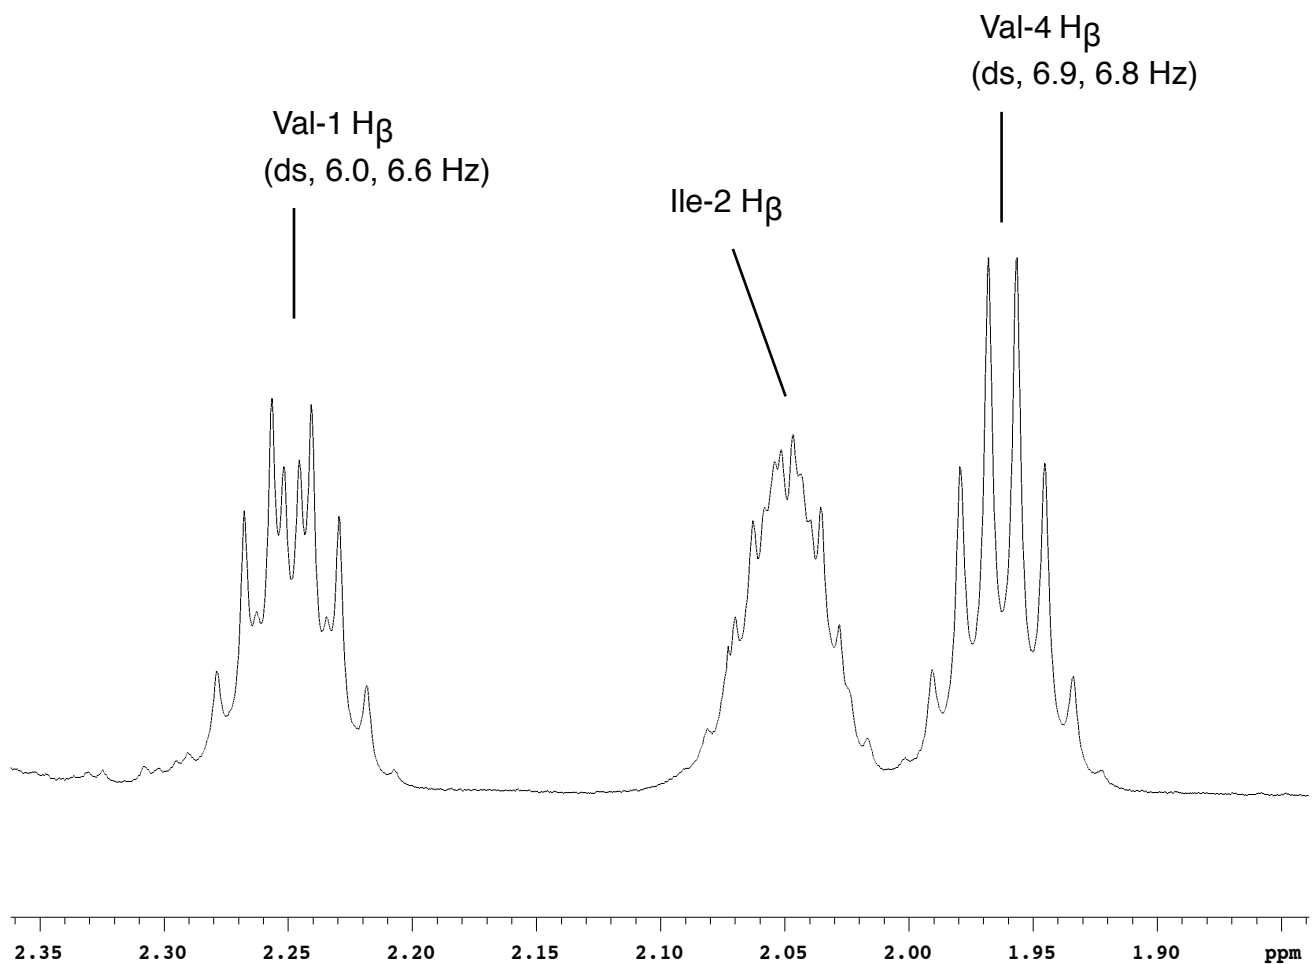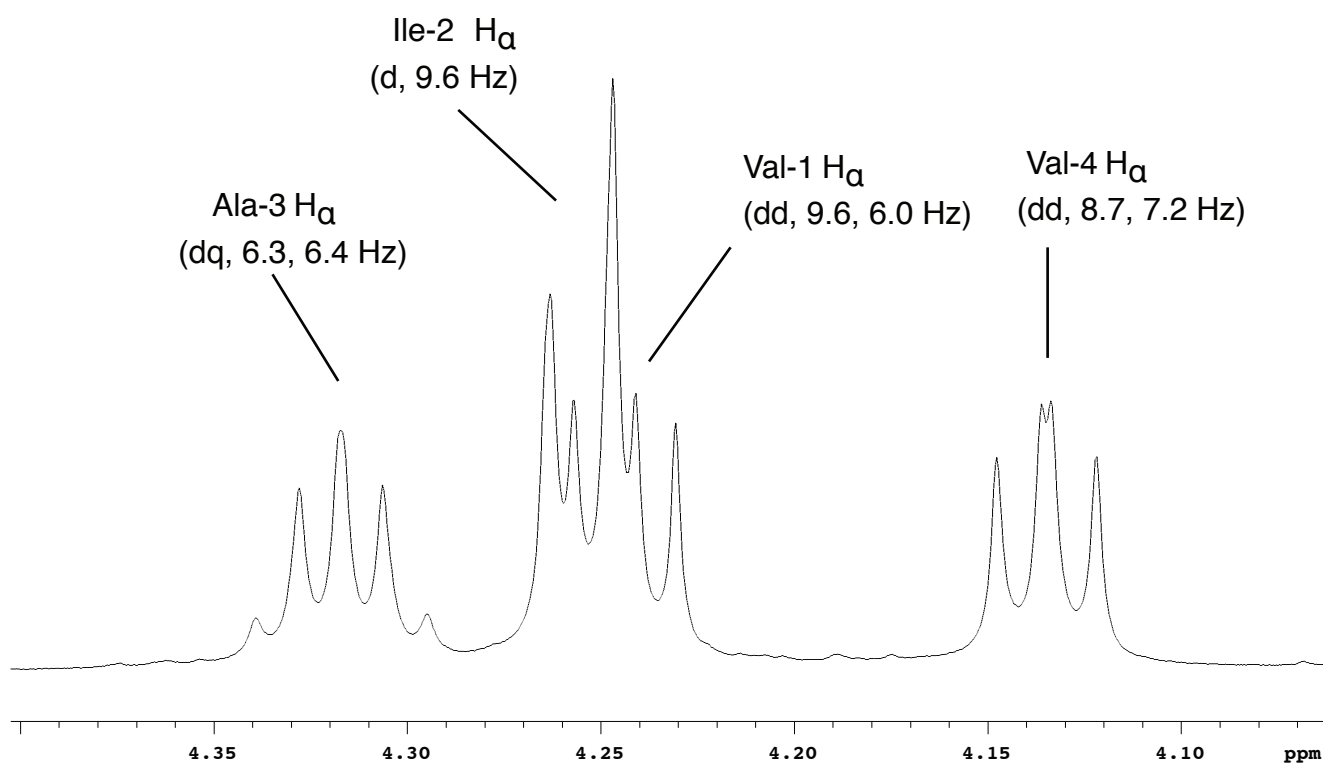

**Figure S2.**  $^{13}\text{C}$  NMR spectrum of EGM-556 (**1**), (150 MHz,  $\text{DMSO-}d_6$ )

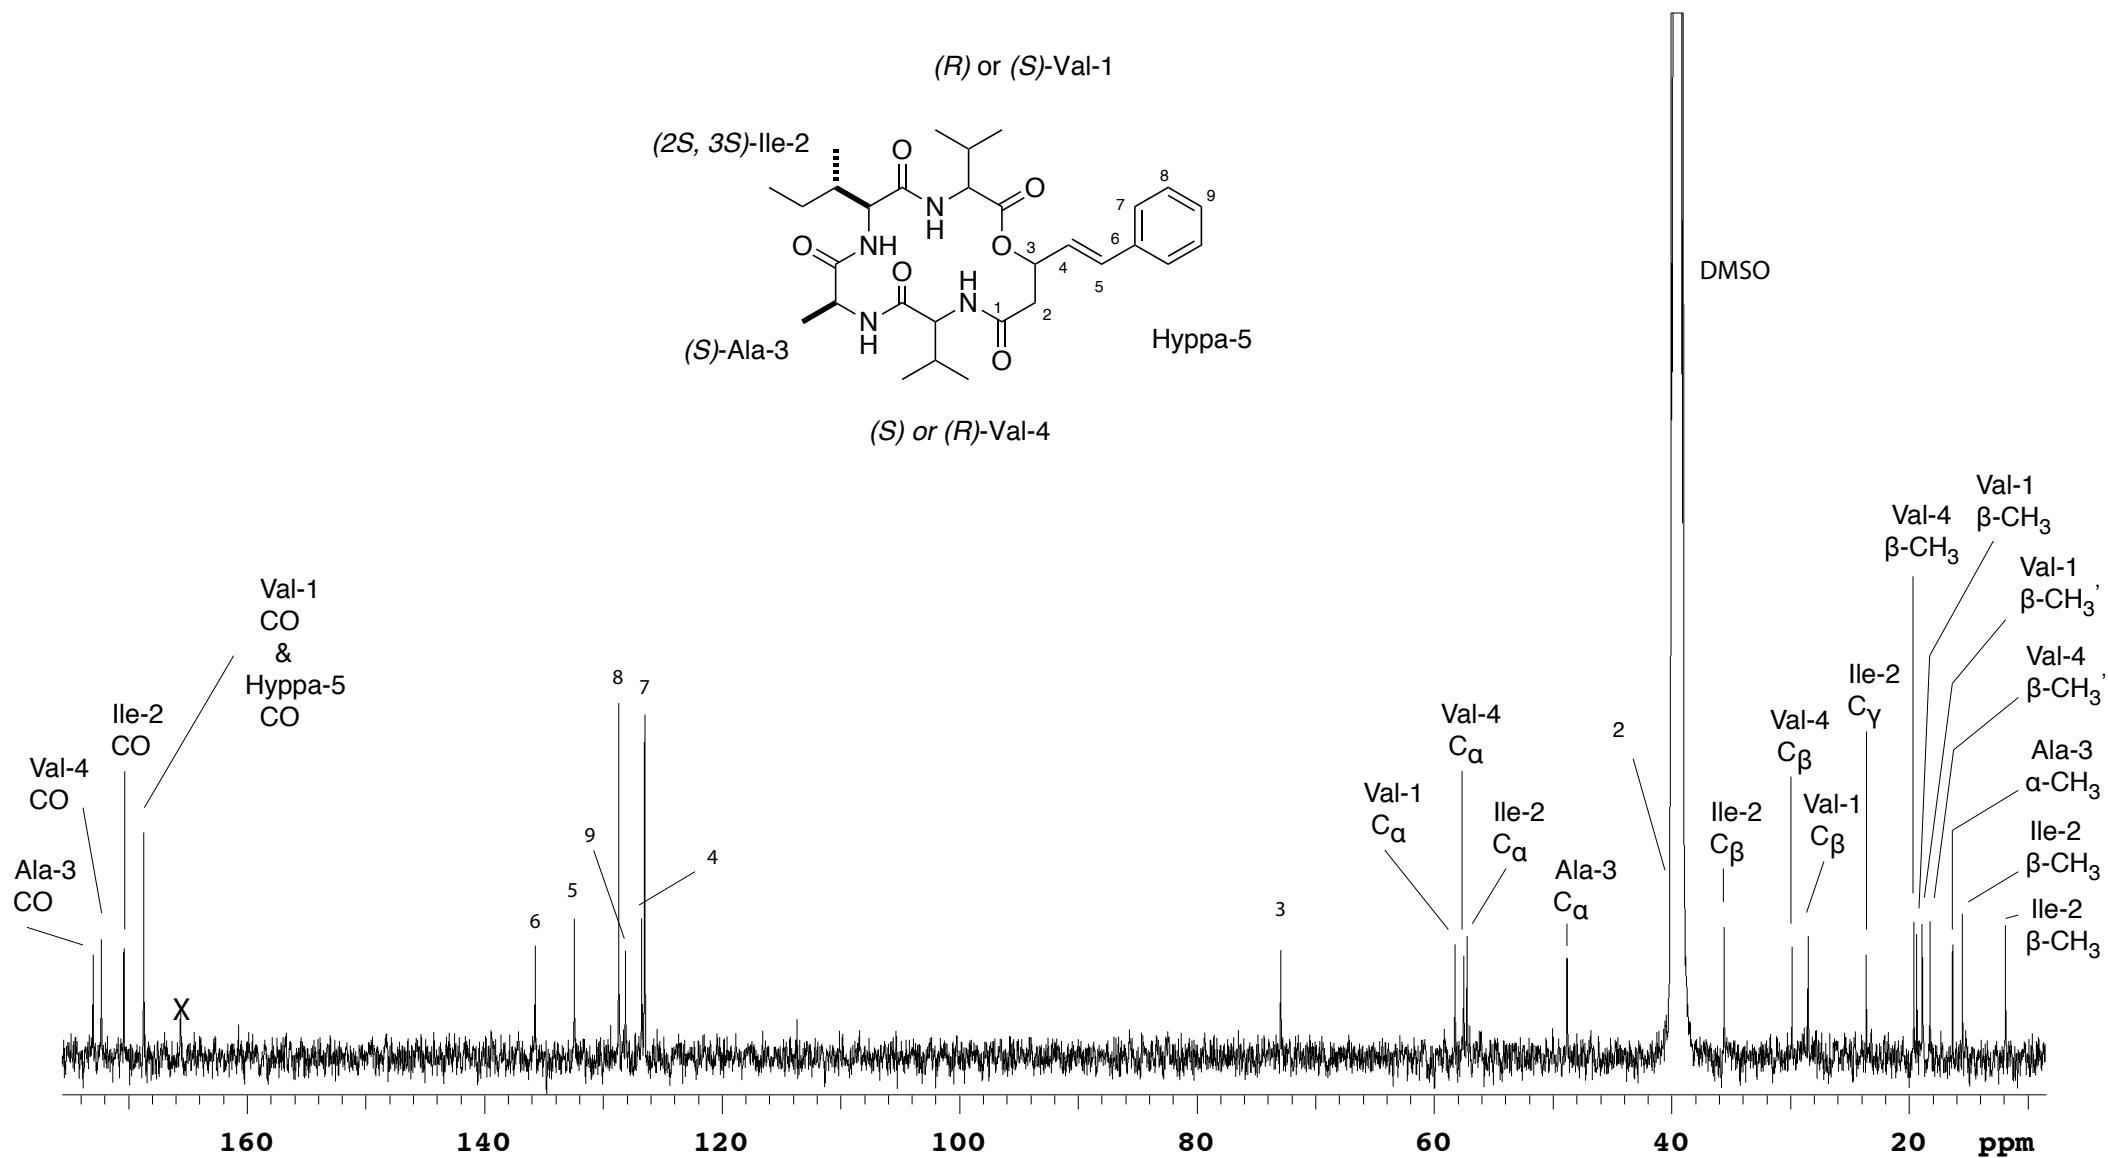



**Figure S3.** DEPT NMR spectrum of EGM-556 (**1**), (150 MHz, DMSO-*d*<sub>6</sub>)

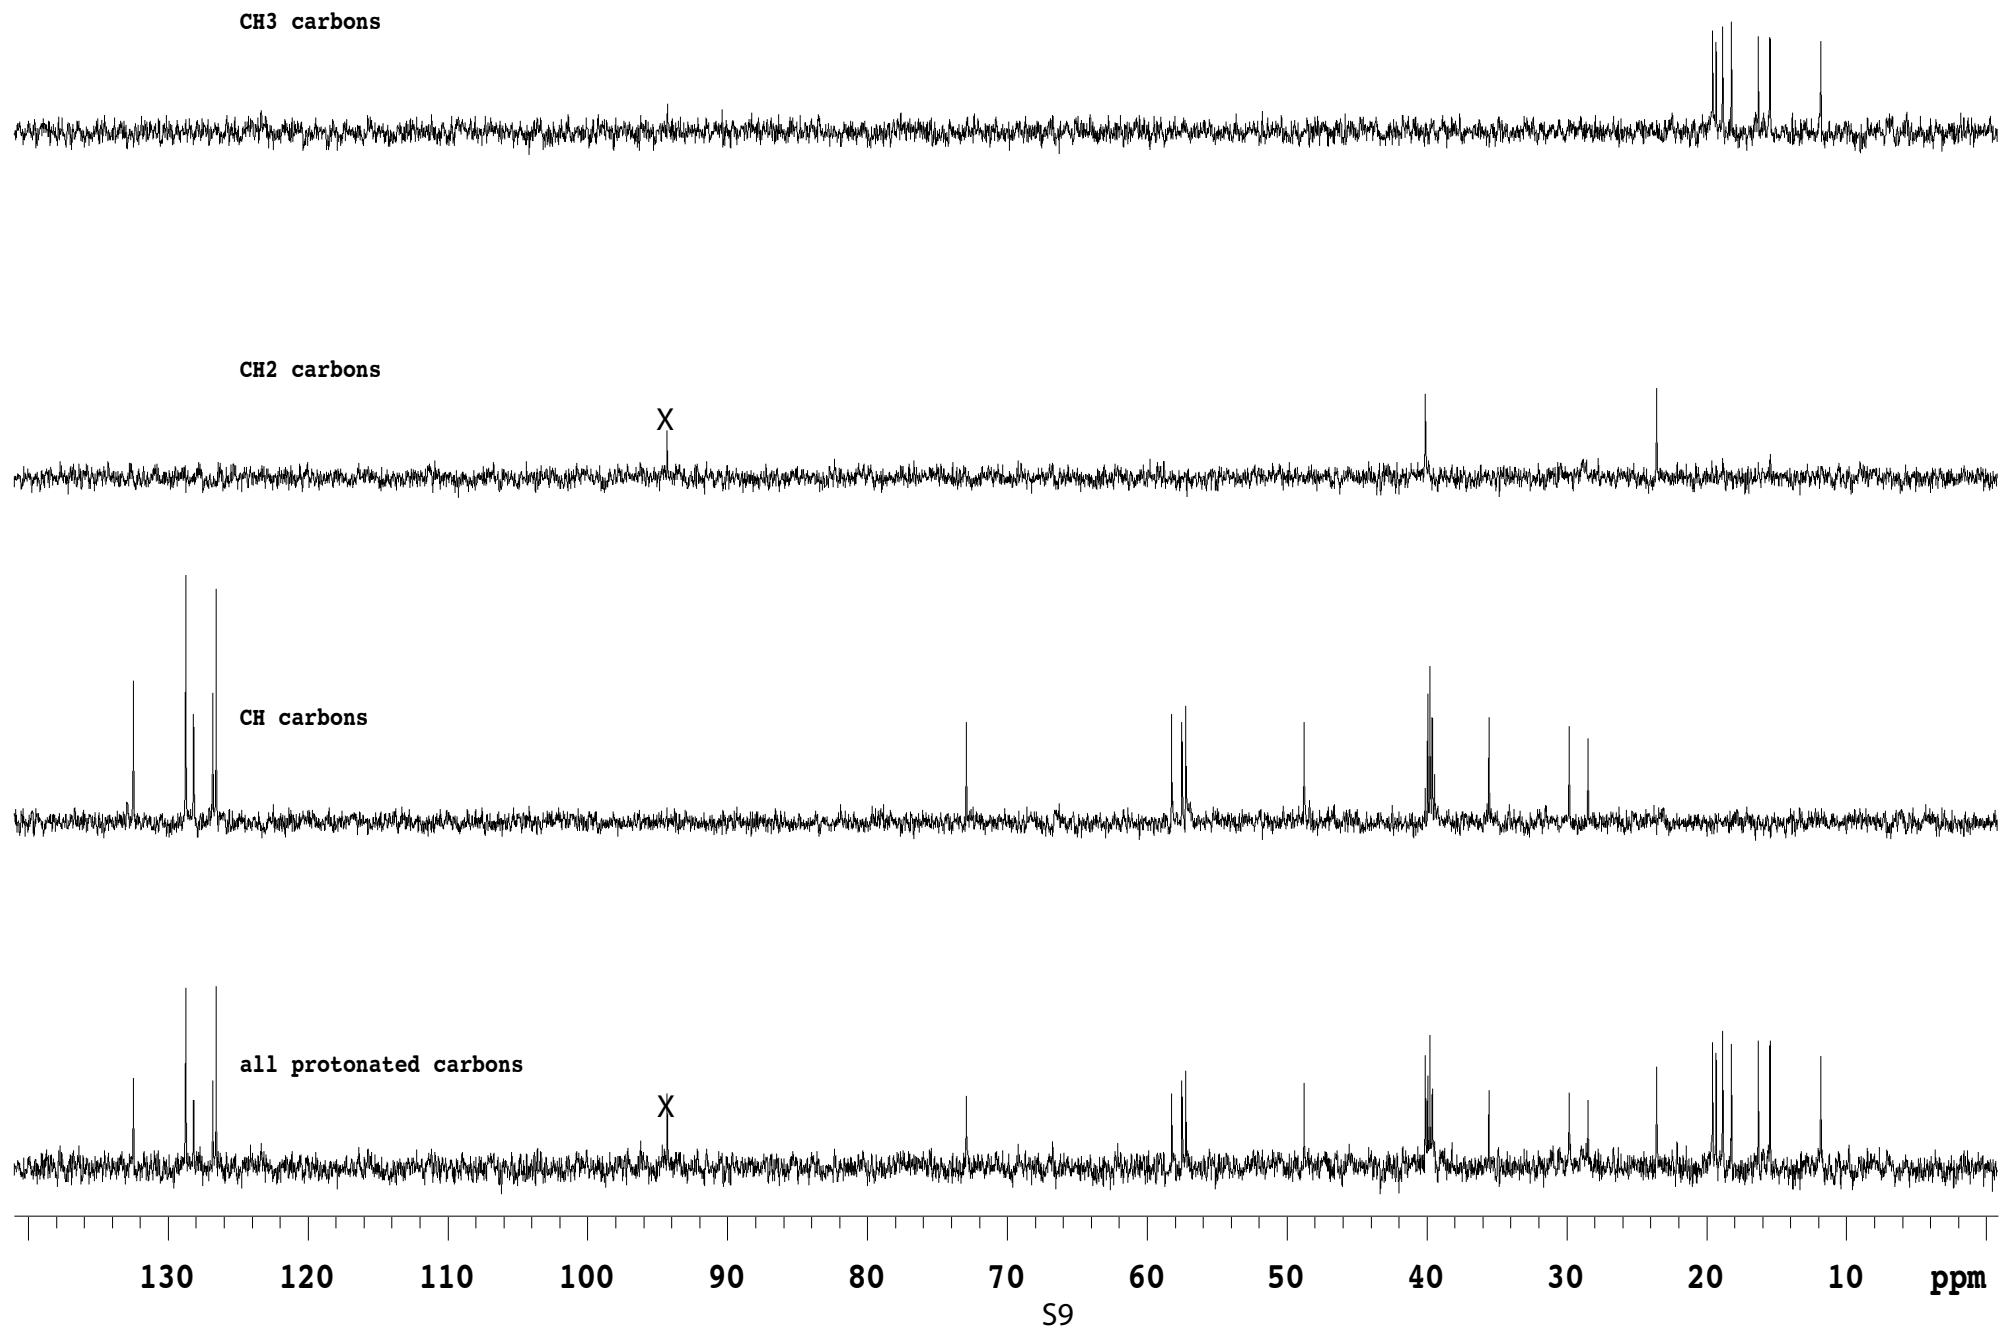

**Figure S4.**  $^1\text{H}$ - $^1\text{H}$  COSY spectrum of EGM-556 (**1**), (600 MHz,  $\text{DMSO-}d_6$ )

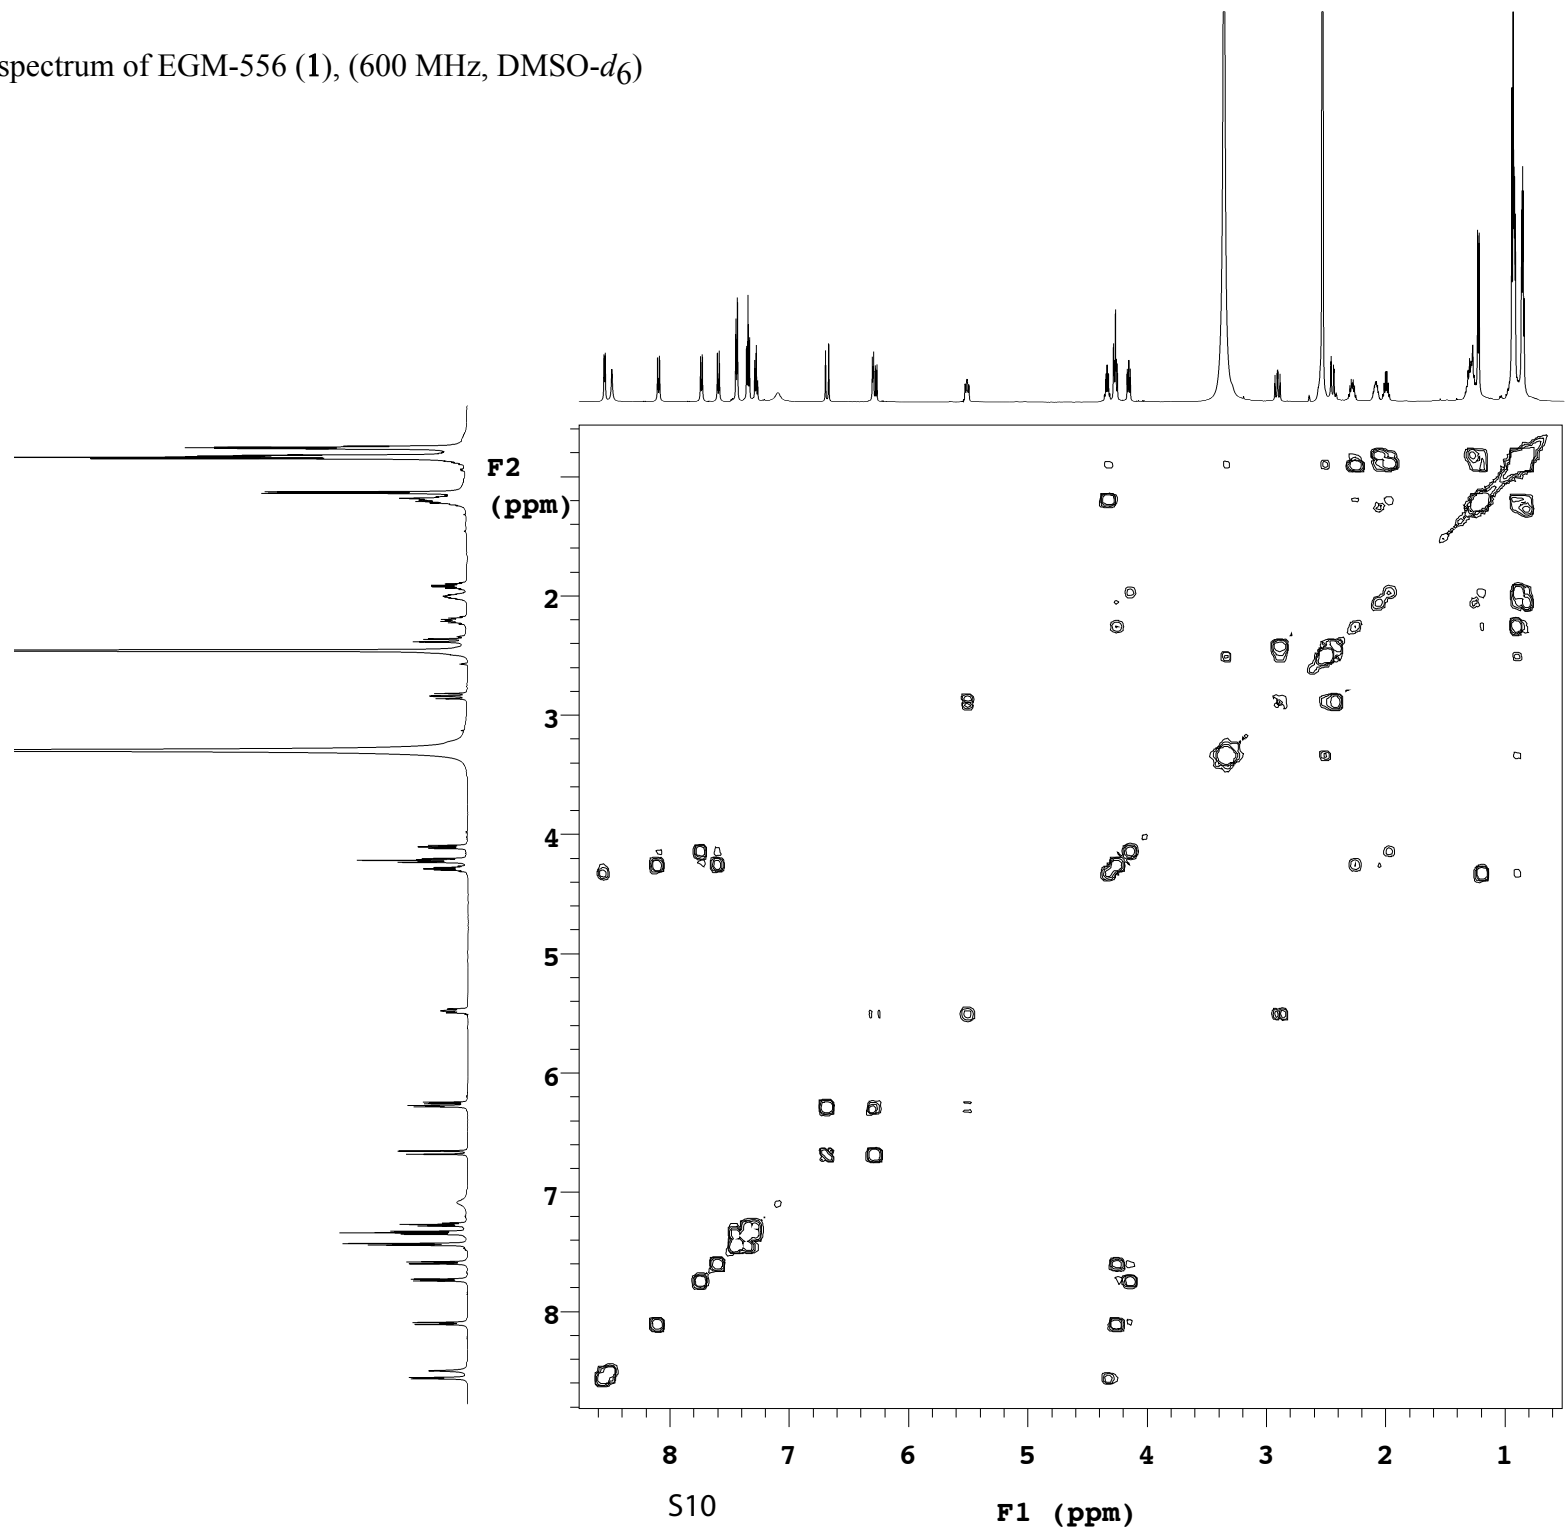

**Figure S5.** gHMQC spectrum of EGM-556 (**1**), (600 MHz, DMSO-*d*<sub>6</sub>)

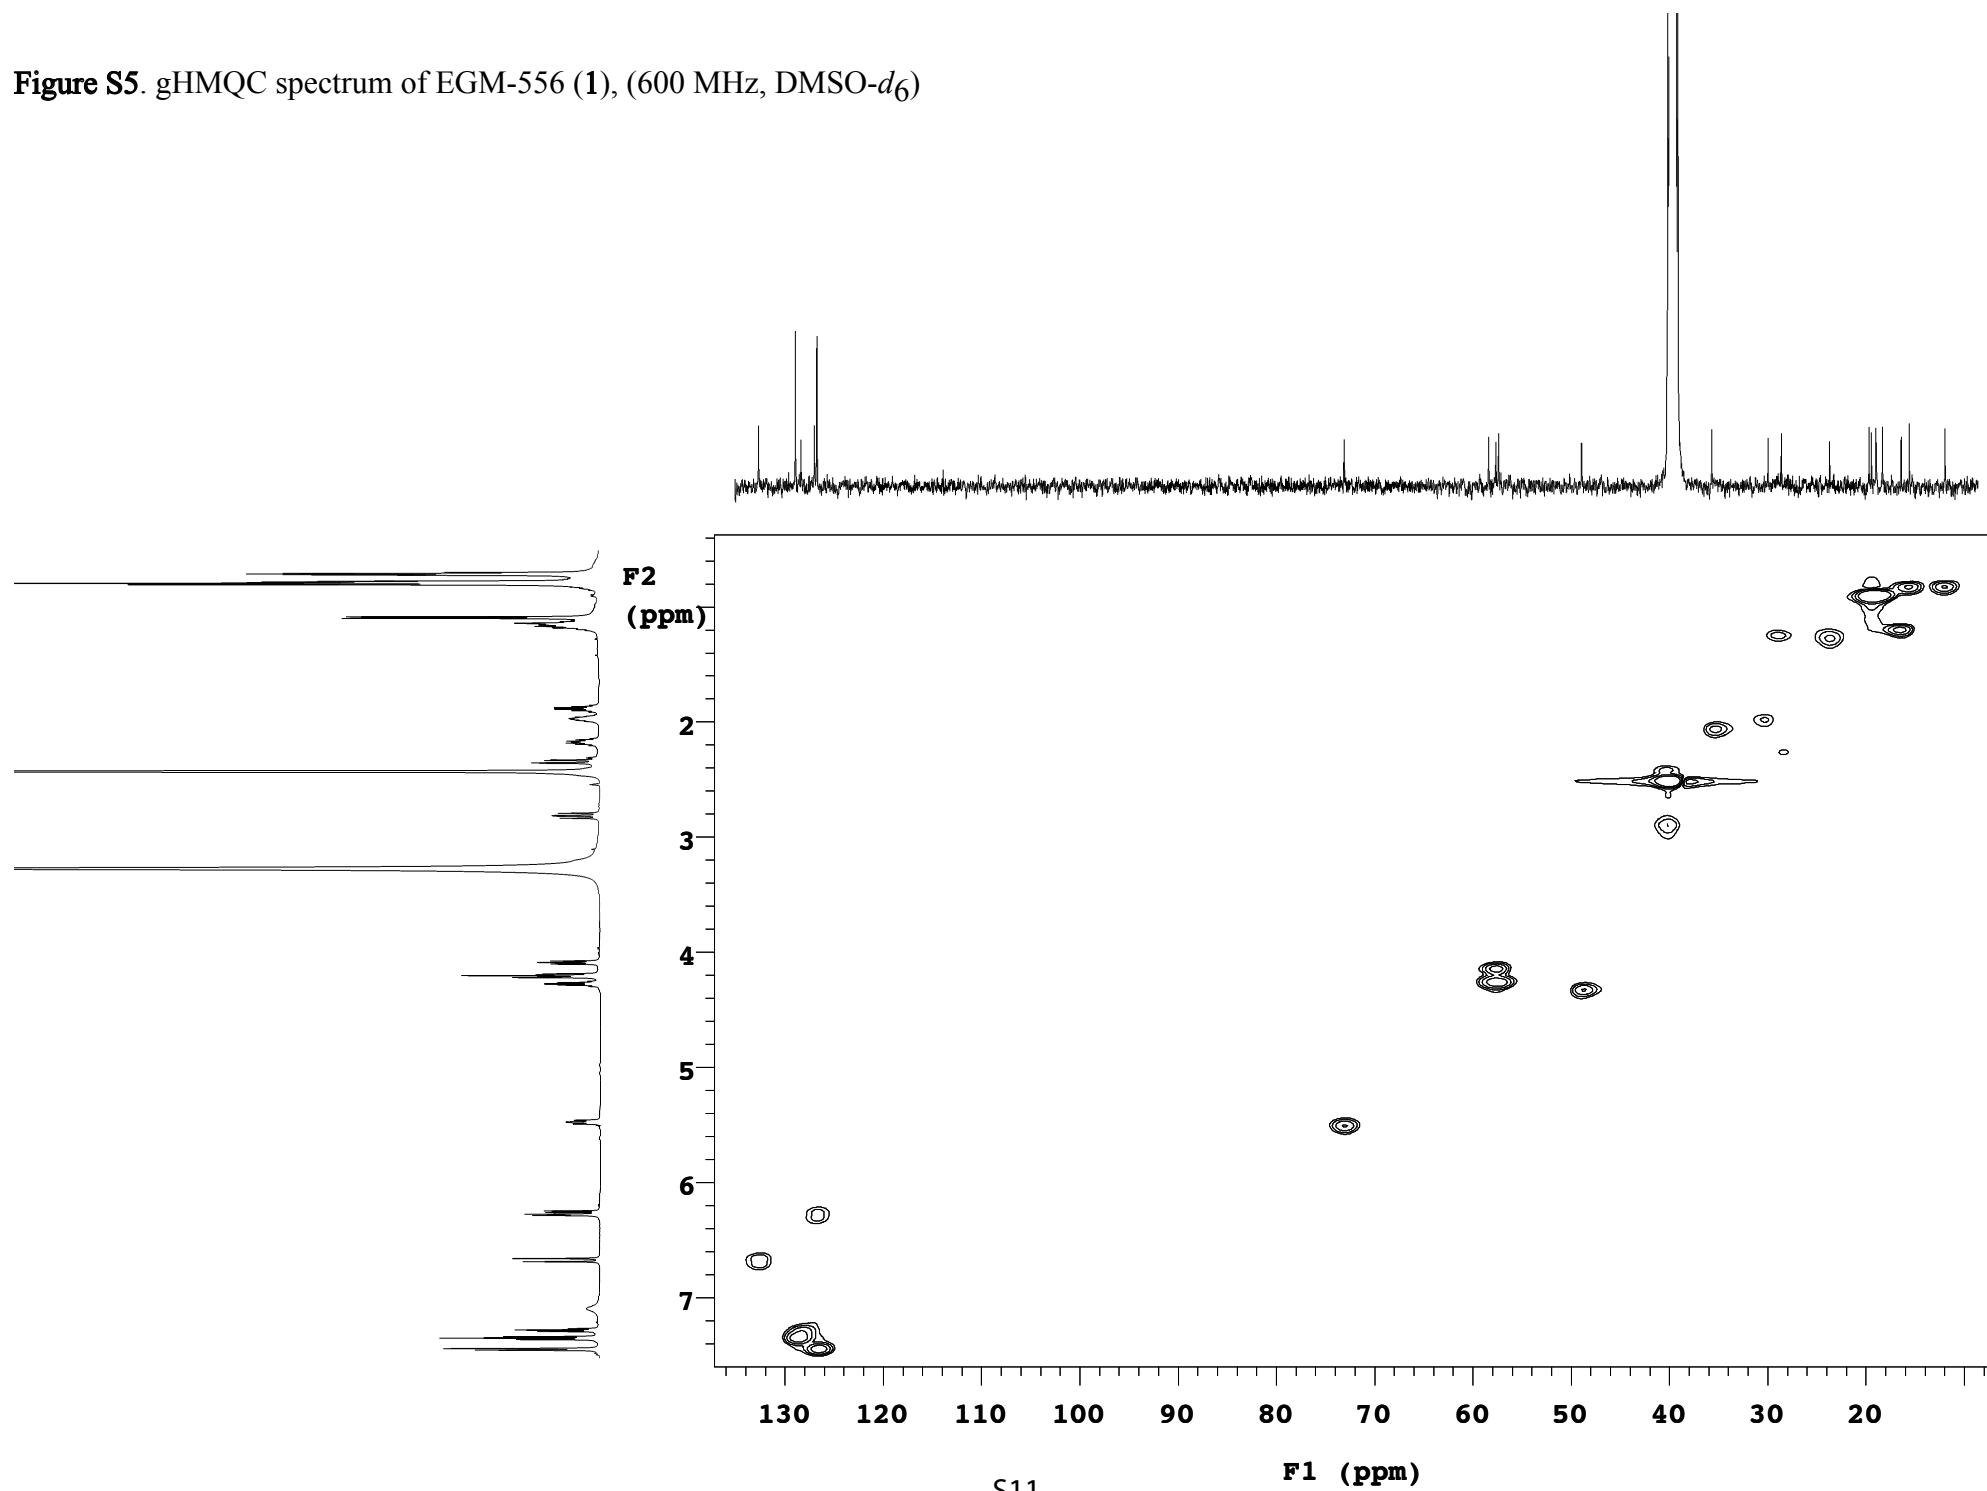

**Figure S6.** gHMBC spectrum of EGM-556 (**1**), (600 MHz, DMSO-*d*<sub>6</sub>)

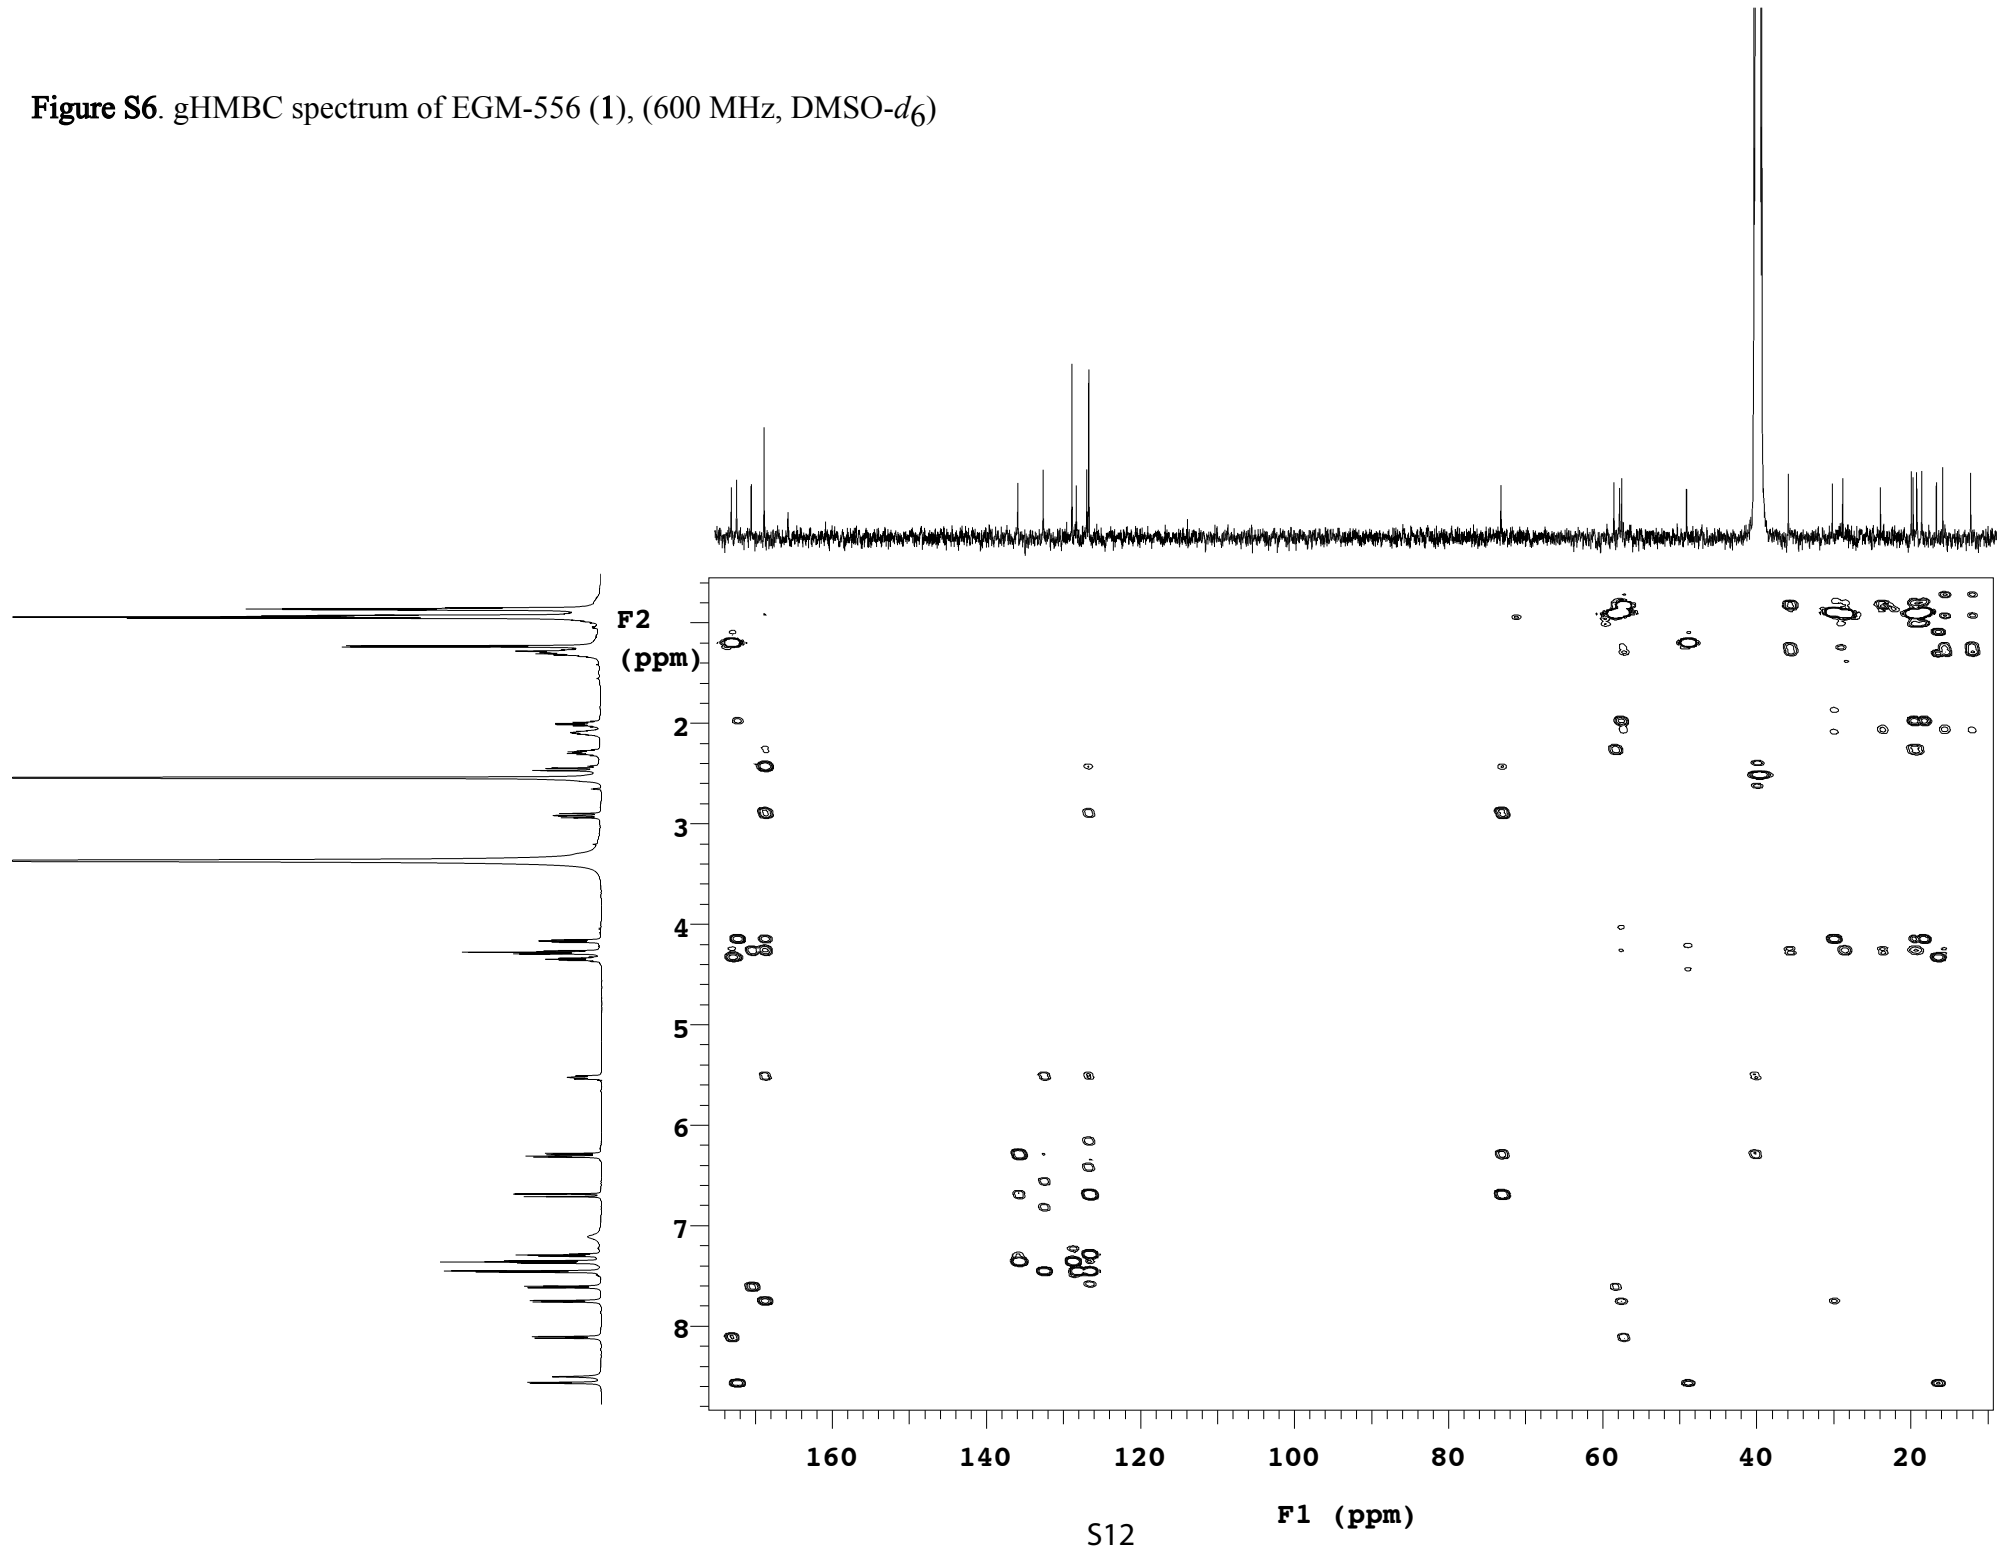

**Figure S7.**  $^1\text{H}$  NMR spectrum of acyclic methyl ester (**2**), (600 MHz,  $\text{DMSO-}d_6$ )

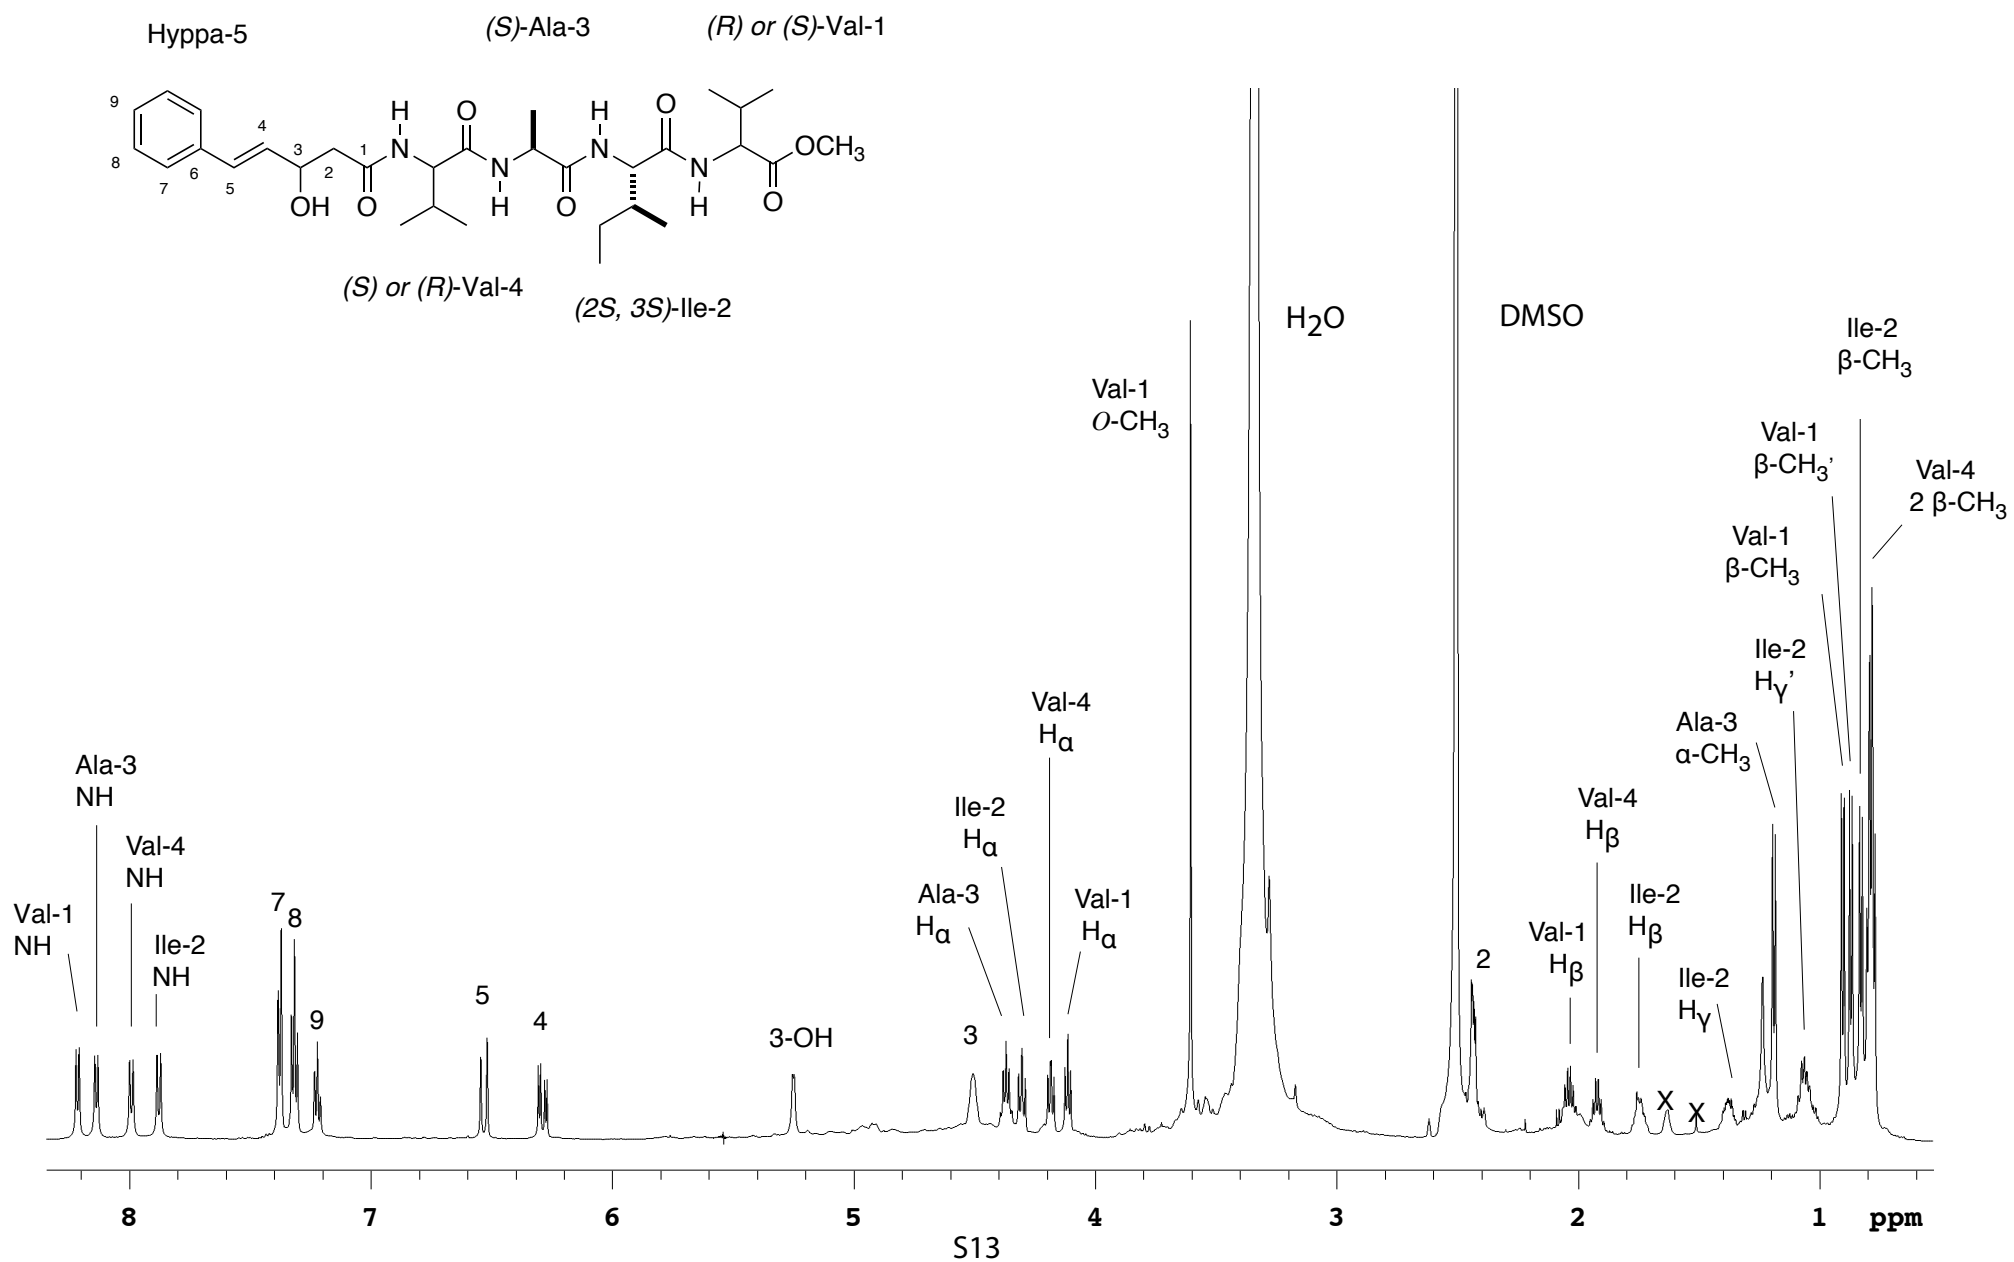

**Figure S8.**  $^{13}\text{C}$  NMR spectrum of acyclic methyl ester (**2**), (150 MHz,  $\text{DMSO-}d_6$ )

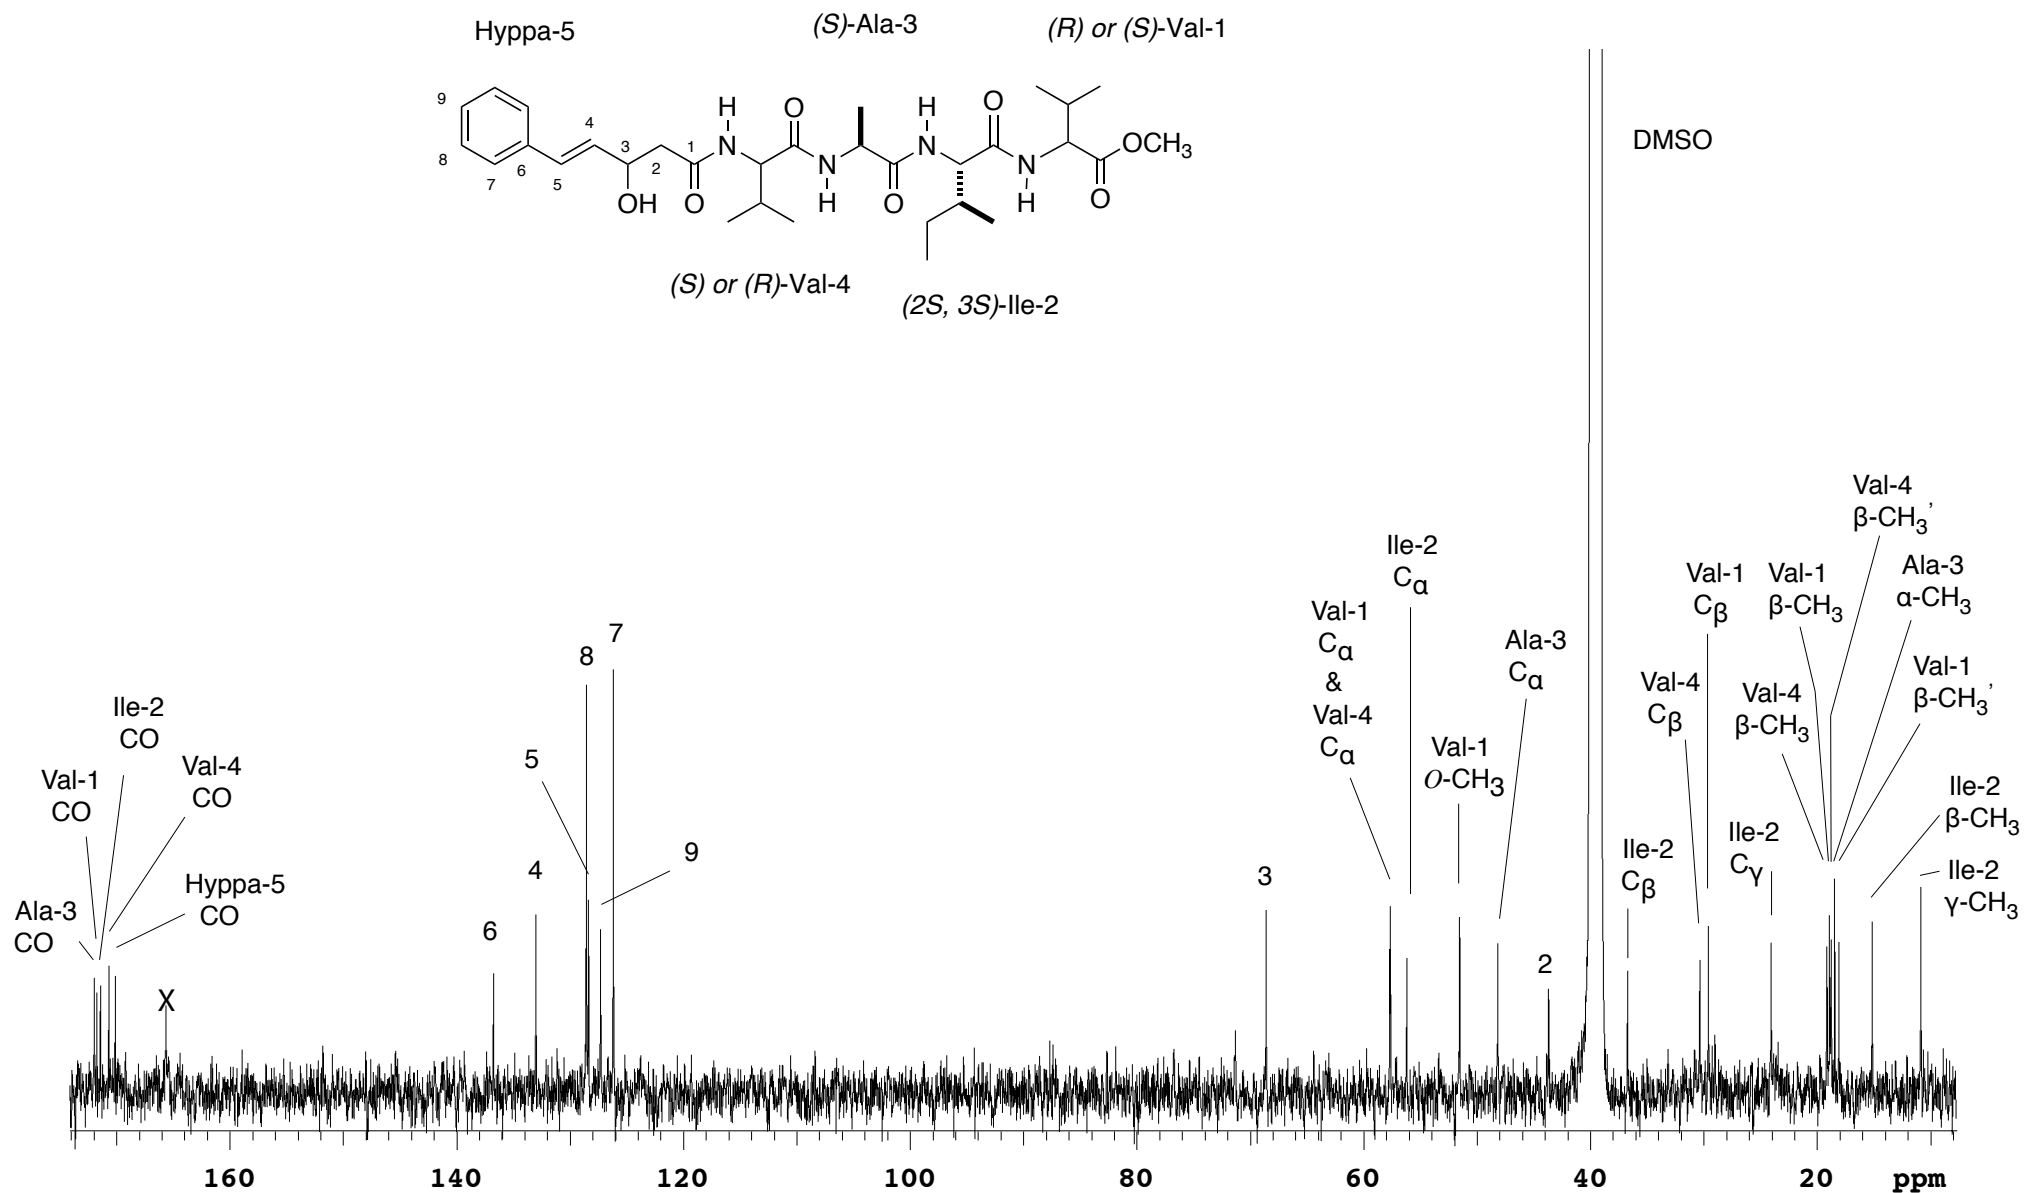

**Figure S9.** DEPT NMR spectrum of acyclic methyl ester (**2**), (150 MHz, DMSO- $d_6$ )

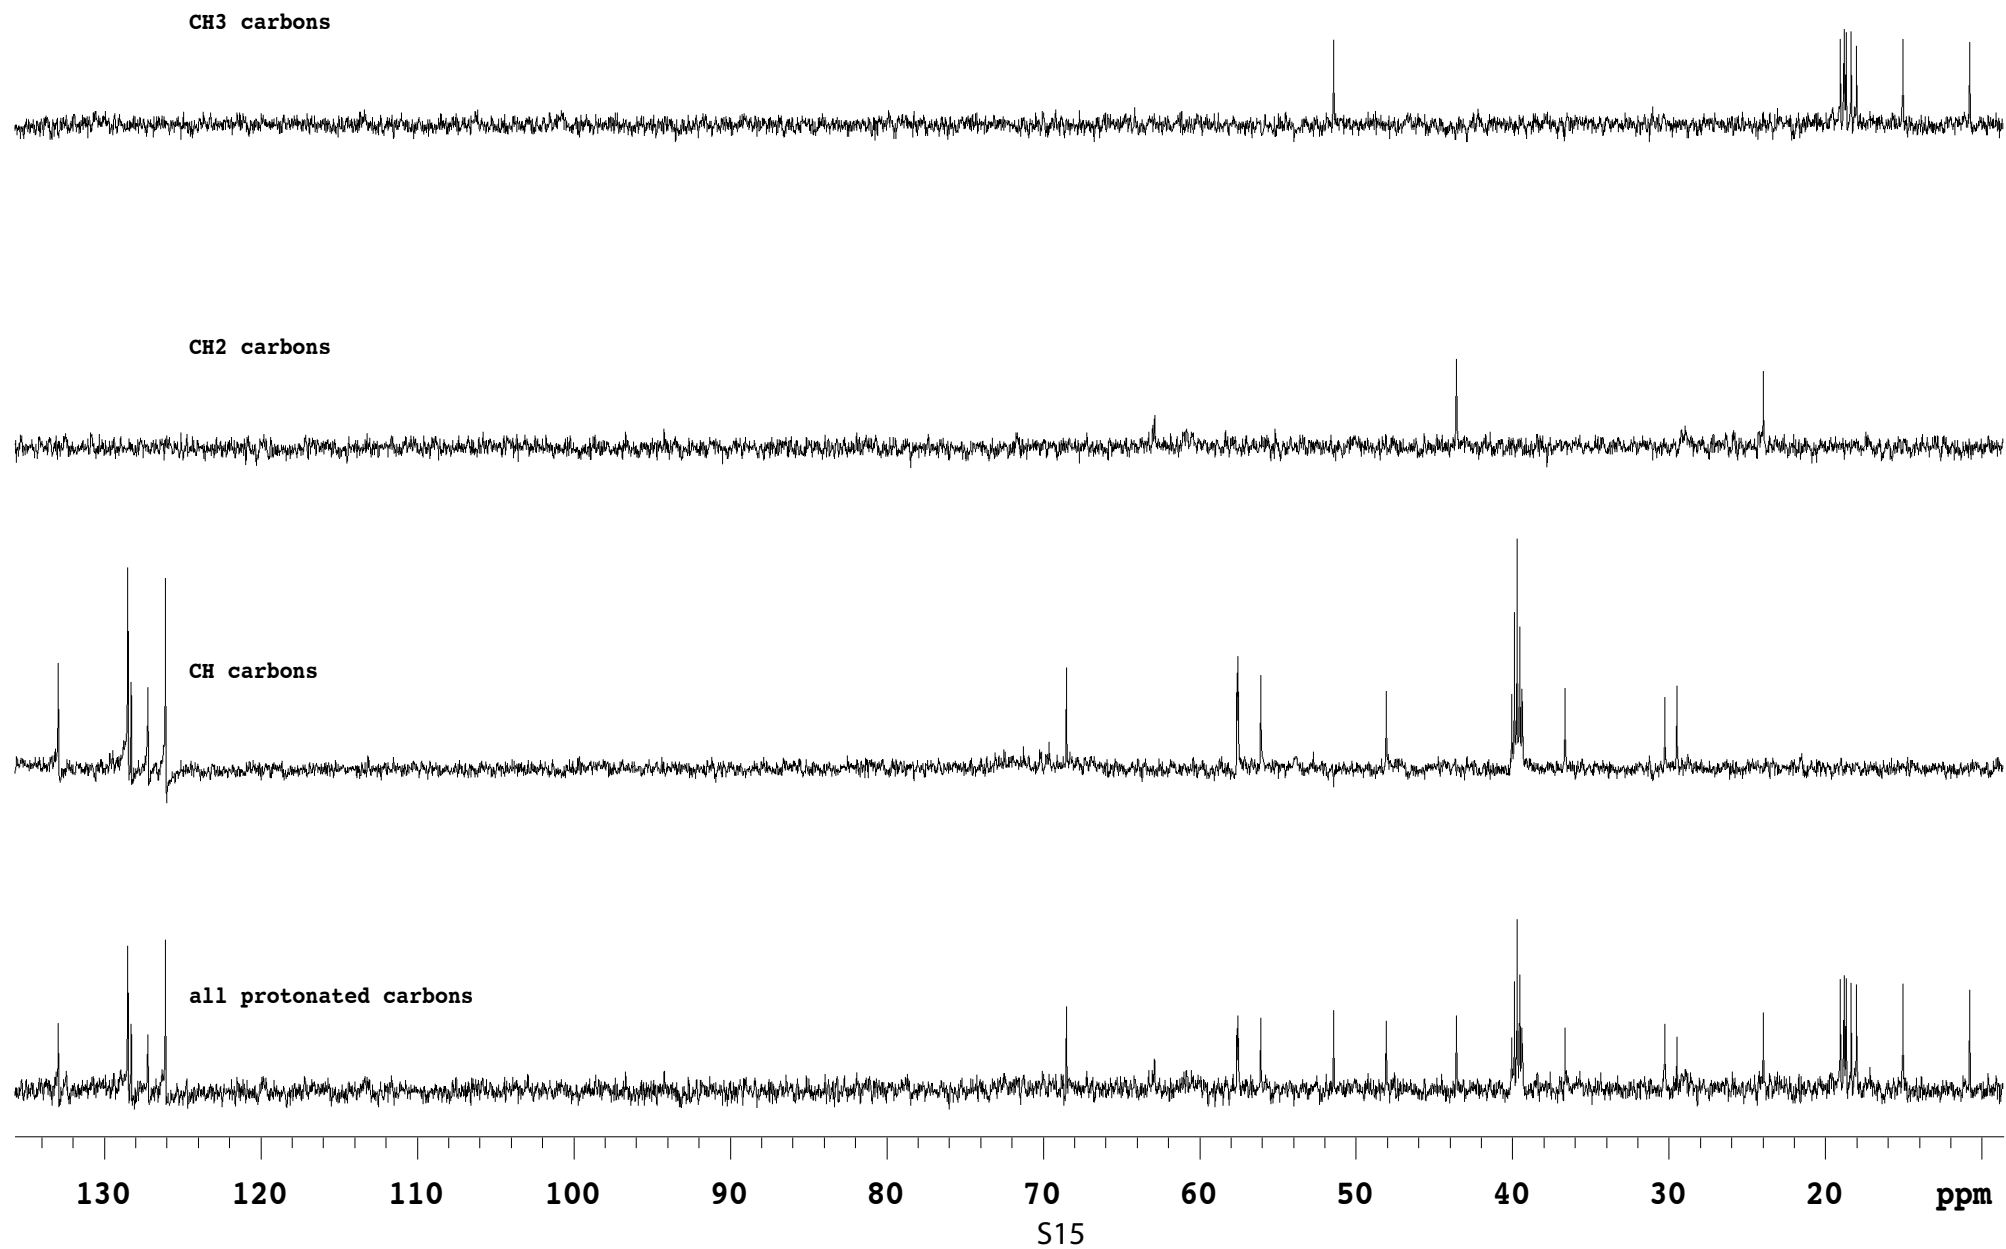

**Figure S10.**  $^1\text{H}$ - $^1\text{H}$  COSY spectrum of acyclic methyl ester (**2**), (600 MHz,  $\text{DMSO-}d_6$ )

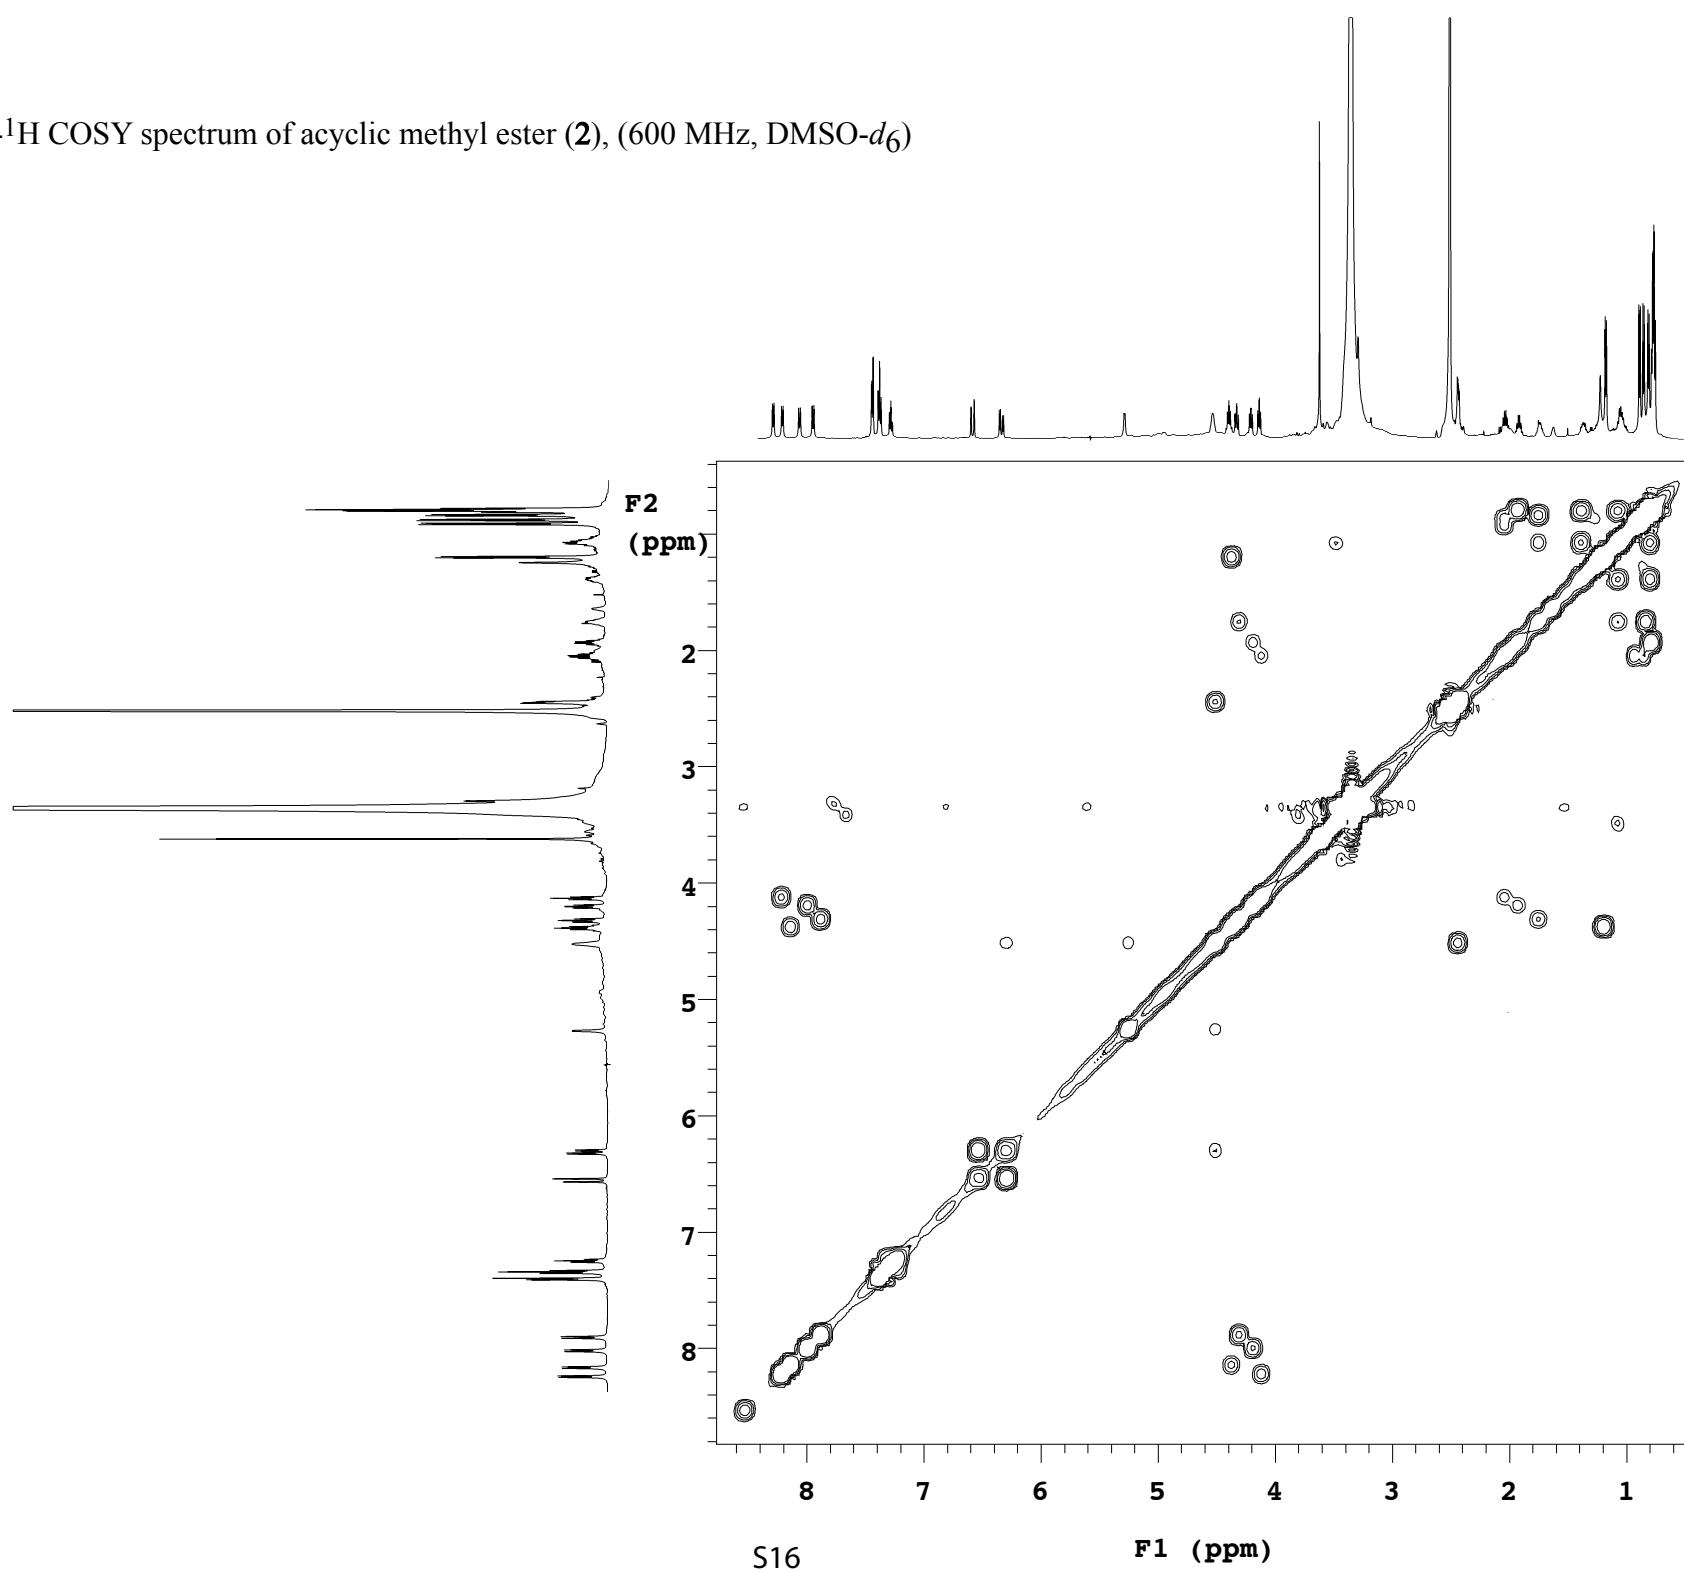



**Figure S11.** gHMQC spectrum of acyclic methyl ester (**2**), (600 MHz, DMSO- $d_6$ )

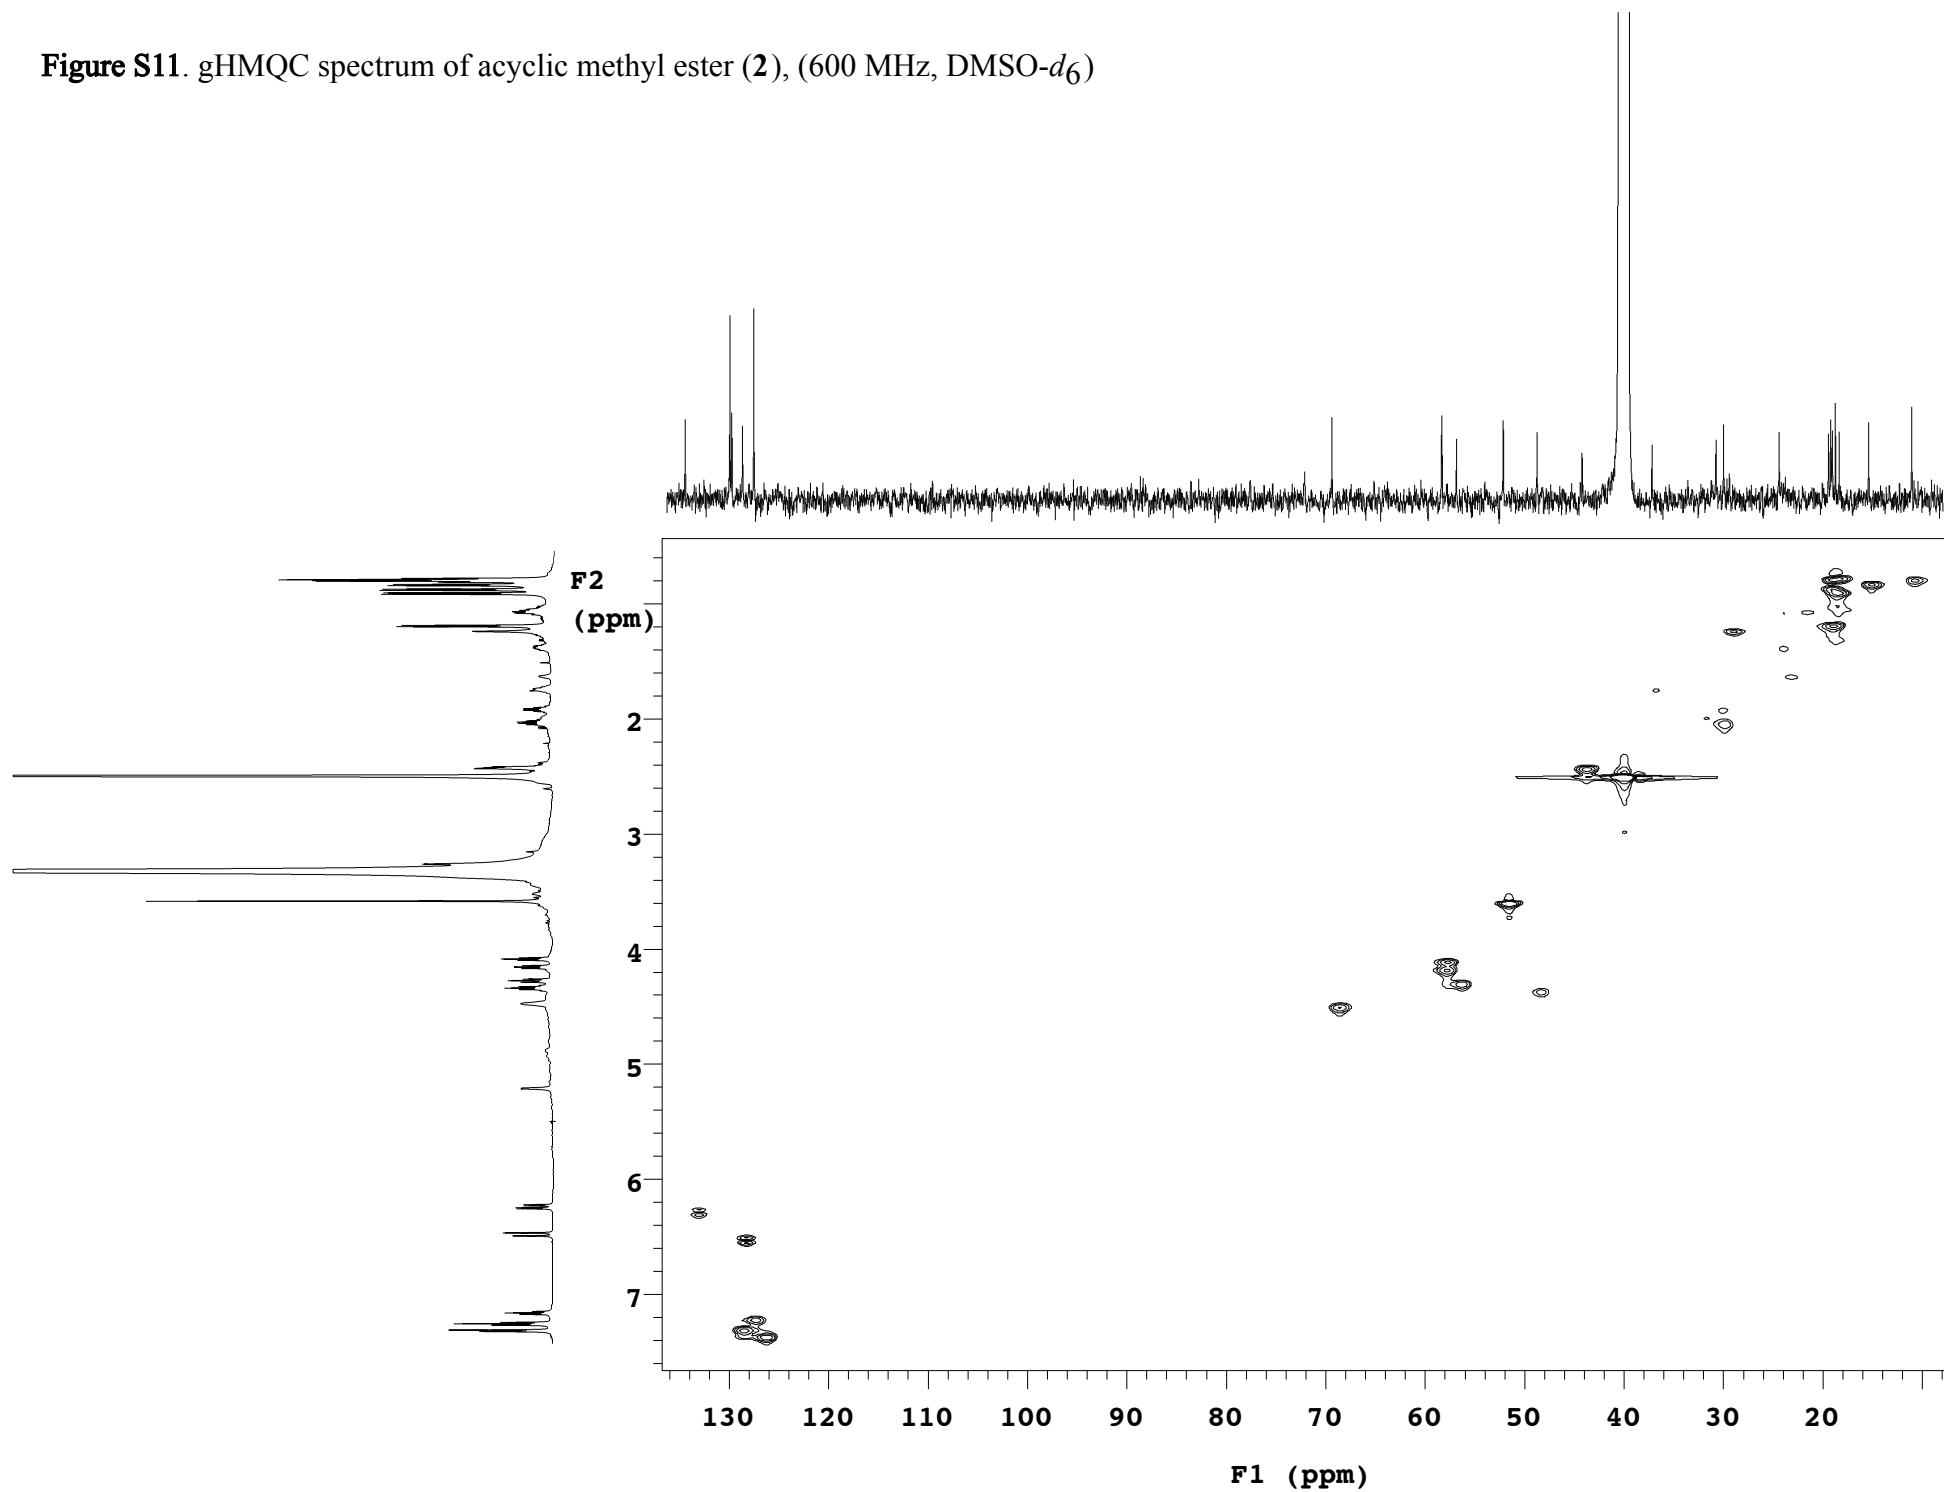

**Figure S12.** gHMBC spectrum of acyclic methyl ester (**2**), (600 MHz, DMSO-*d*<sub>6</sub>)

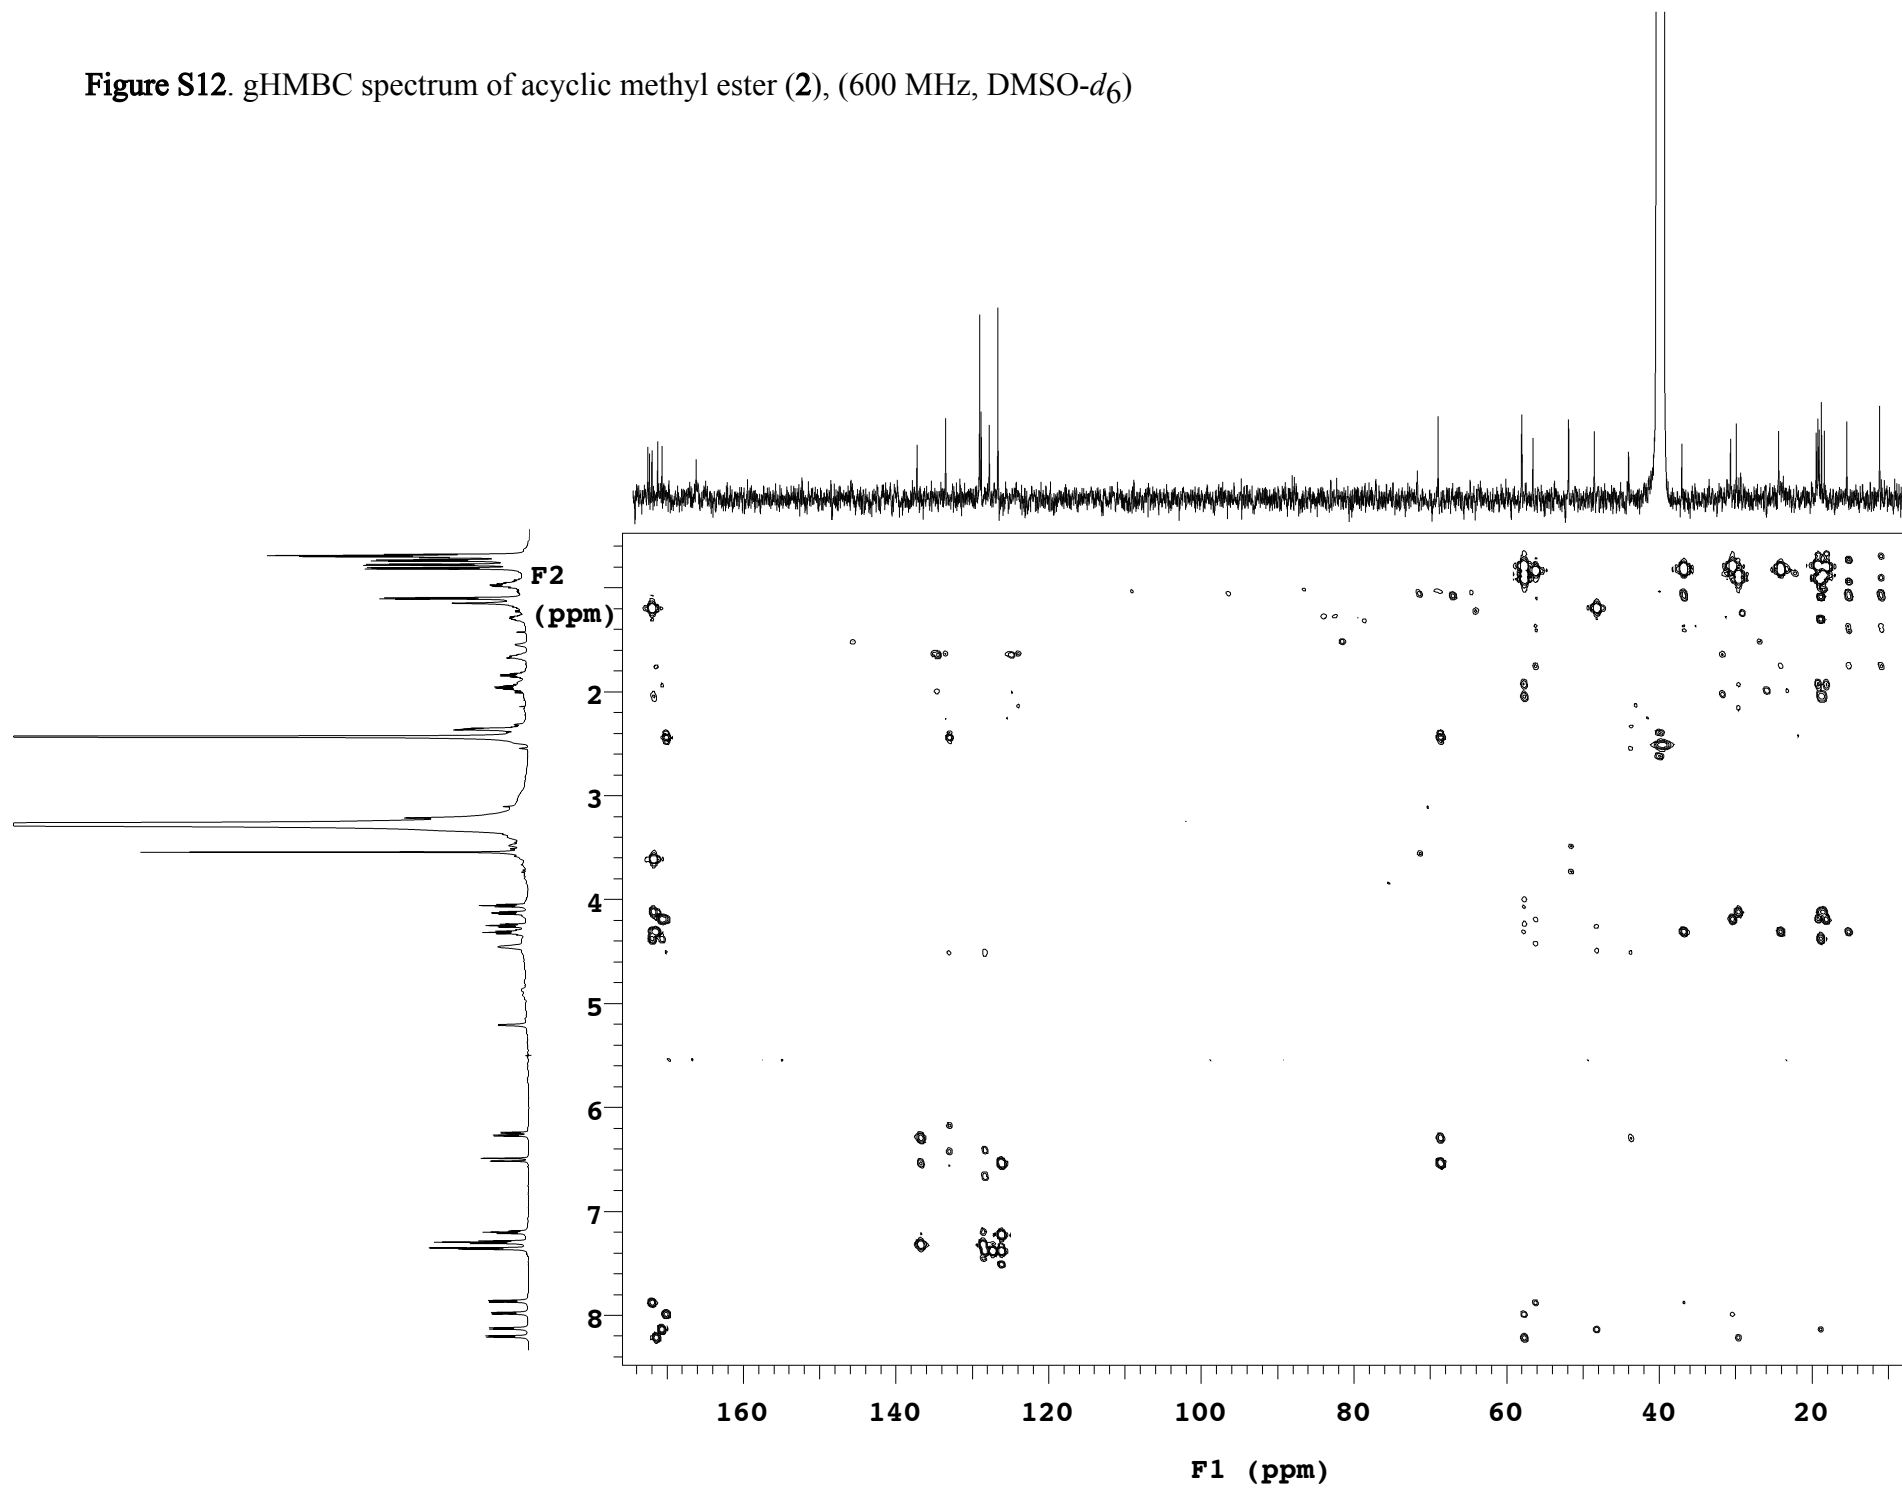

**Figure S13.** RP C18 LC-ELSD-MS traces of EGM-556 (**1**) hydrolysate (solid line) and comparison to free amino acids (dashed line), derivatized with Marfey's reagent (FDDA).

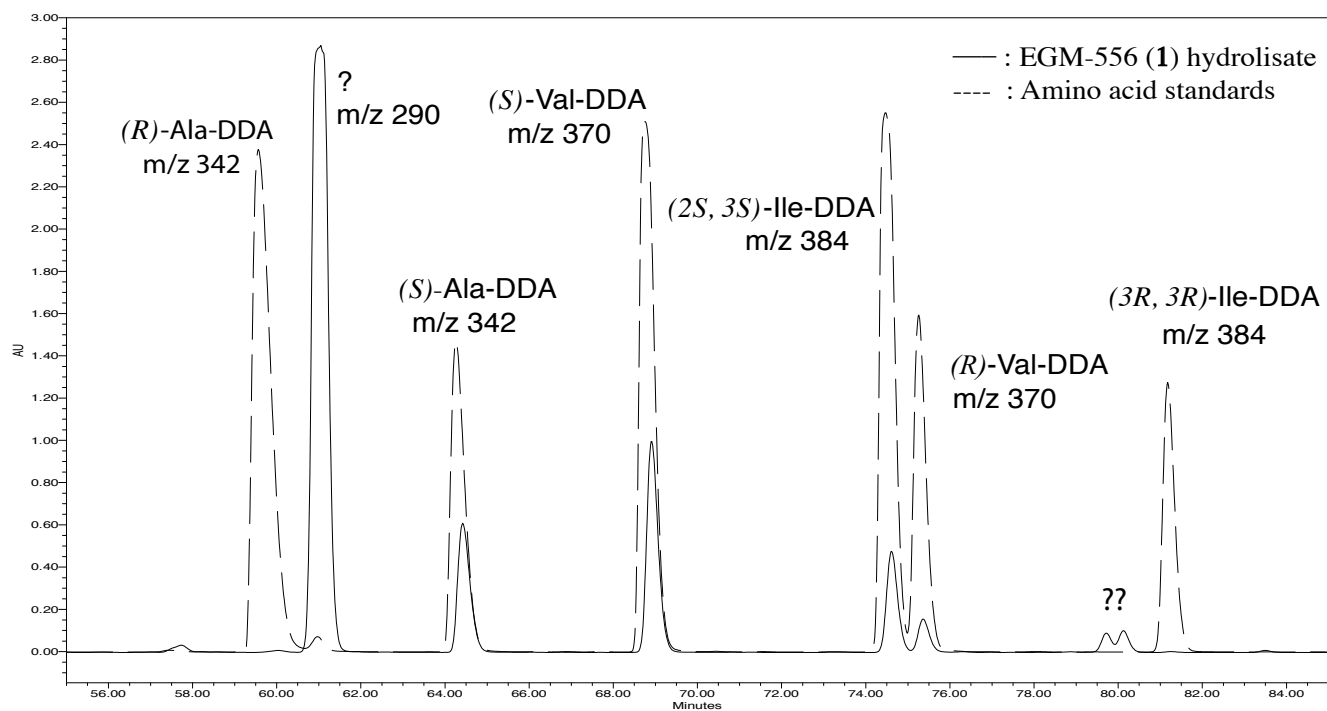

**Figure S14.** Chiral separation of  $(2S, 3S)$ -isoleucine and  $(2R, 3S)$ -isoleucine and comparison with the hydrolysate of EGM-556 (**1**), derivatised with Marfey's reagent (FDDA).

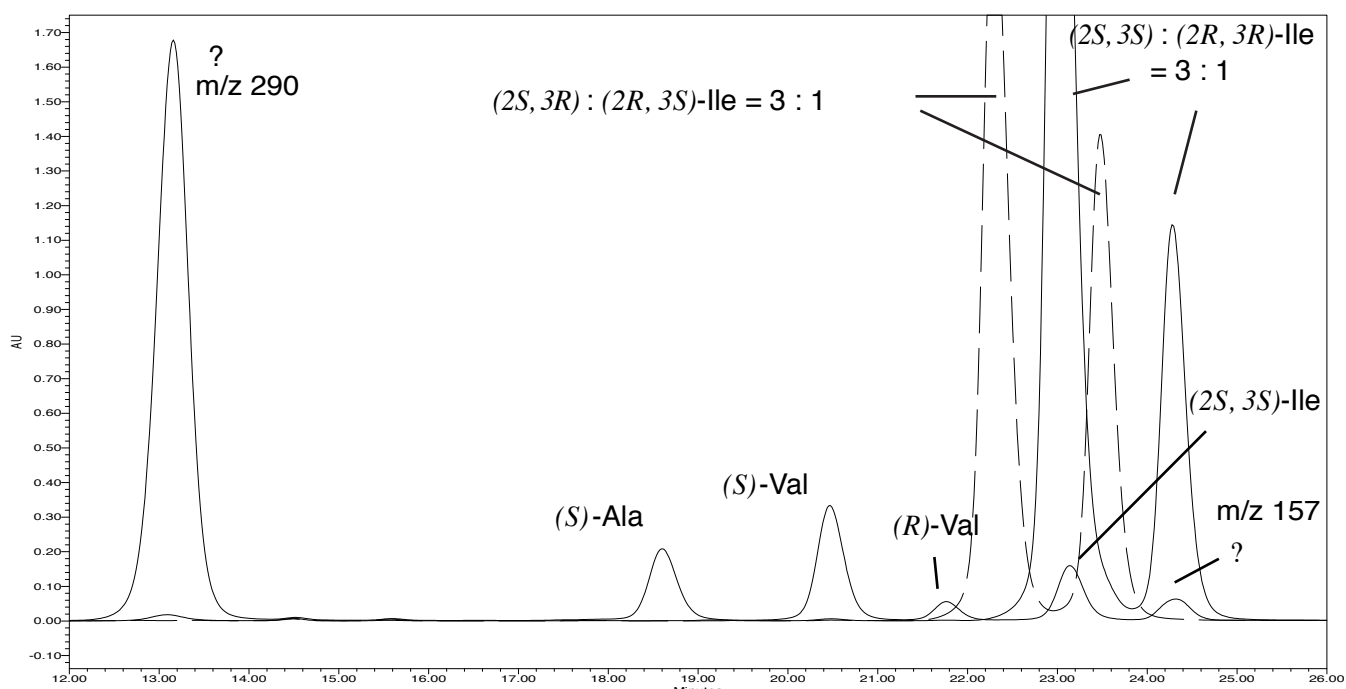

**Table S3. NMR Assignments for EGM-556 (1) in DMSO-*d*<sub>6</sub>**

| Structural Unit | Position          | <sup>13</sup> C <sup>a</sup> δ, type <sup>b</sup> | <sup>1</sup> H δ (m, J(Hz), int) | COSY       | gHMBC                                |
|-----------------|-------------------|---------------------------------------------------|----------------------------------|------------|--------------------------------------|
| Val-1           | CO                | 168.7, qC                                         |                                  |            | 4.24, 5.50, 2.25                     |
|                 | α                 | 58.2, CH                                          | 4.24 (dd, 9.6, 6.0, 1H)          | 2.25       | 7.60, 2.25, 0.89                     |
|                 | β                 | 28.5, CH                                          | 2.25 (ds, 6.0, 6.6, 1H)          | 4.24, 0.89 | 4.24, 0.89                           |
|                 | β-CH <sub>3</sub> | 18.9, CH <sub>3</sub>                             | 0.89 (d, 6.6, 3H)                | 2.25       | 4.24, 0.89                           |
|                 | β-CH <sub>3</sub> | 19.3, CH <sub>3</sub>                             | 0.89 (d, 6.6, 3H)                | 2.25       | 4.24, 2.25, 0.89                     |
|                 | NH                |                                                   | 7.60 (d, 9.6, 1H)                | 4.24       |                                      |
| Ile-2           | CO                | 170.4, qC                                         |                                  |            | 7.60, 4.26, 4.24                     |
|                 | α                 | 57.2, CH                                          | 4.26 (d, 9.6, 1H)                | 8.10       | 8.10, 2.05, 1.26, 0.81               |
|                 | β                 | 35.6, CH                                          | 2.05 (m, 1H)                     | 1.26, 0.81 | 4.26, 1.26, 0.81                     |
|                 | γ                 | 23.6, CH <sub>2</sub>                             | 1.26 (m, 2H)                     | 2.05, 0.81 | 4.26, 2.05, 0.81                     |
|                 | β-CH <sub>3</sub> | 15.5, CH <sub>3</sub>                             | 0.81 (d, 6.6, 3H)                | 2.05, 1.26 | 4.26, 2.05, 1.26                     |
|                 | γ-CH <sub>3</sub> | 11.9, CH <sub>3</sub>                             | 0.81 (t, 7.5, 3H)                | 2.05, 1.26 | 2.05, 1.26                           |
| Ala-3           | NH                |                                                   | 8.10 (d, 9.6, 1H)                | 4.26       |                                      |
|                 | CO                | 173.0, qC                                         |                                  |            | 8.10, 4.32, 1.18                     |
|                 | α                 | 48.8, CH                                          | 4.32 (dq, 6.3, 6.4, 1H)          | 8.56, 1.18 | 8.56, 1.18                           |
|                 | α-CH <sub>3</sub> | 16.3, CH <sub>3</sub>                             | 1.18 (d, 7.2, 3H)                | 4.32       | 8.56, 4.32                           |
| Val-4           | NH                |                                                   | 8.56 (d, 6.3, 1H)                | 4.32       |                                      |
|                 | CO                | 172.3, qC                                         |                                  |            | 8.56, 4.14, 1.96                     |
|                 | α                 | 57.5, CH                                          | 4.14 (dd, 8.7, 7.2, 1H)          | 7.74, 1.96 | 7.74, 1.96, 0.89                     |
|                 | β                 | 29.8, CH                                          | 1.96 (ds, 6.9, 6.8, 1H)          | 4.14, 0.89 | 7.74, 4.14, 0.89                     |
|                 | β-CH <sub>3</sub> | 19.6, CH <sub>3</sub>                             | 0.89 (d, 6.6, 3H)                | 1.96       | 4.14, 1.96, 0.89                     |
|                 | β-CH <sub>3</sub> | 18.2, CH <sub>3</sub>                             | 0.89 (d, 6.6, 3H)                | 1.96       | 4.14, 1.96, 0.89                     |
| Hyppa-5         | NH                |                                                   | 7.74 (d, 8.7, 1H)                | 4.14, 0.89 |                                      |
|                 | 1                 | 168.7, qC                                         |                                  |            | 7.74, 5.50, 2.88, 2.42<br>4.14, 1.96 |
|                 | 2                 | 40.1, CH <sub>2</sub> *                           | 2.42 (dd, 14.4, 1.8, 1H)         | 2.88       | 6.28, 5.50                           |
|                 |                   |                                                   | 2.88 (dd, 14.4, 10.5, 1H)        | 2.42, 5.50 |                                      |
|                 | 3                 | 72.9, CH                                          | 5.50 (ddd, 10.5, 7.1, 1.8, 1H)   | 2.88, 6.28 | 6.68, 6.28, 2.88, 2.42               |
|                 | 4                 | 126.7, CH                                         | 6.28 (dd, 15.9, 7.1, 1H)         | 6.68, 5.50 | 6.68, 2.88, 2.42                     |
|                 | 5                 | 132.4, CH                                         | 6.68 (d, 15.9, 1H)               | 6.28       | 7.44, 5.50                           |
|                 | 6                 | 135.7, qC                                         |                                  |            | 7.36, 6.68, 6.28                     |
|                 | 7                 | 126.5, CH                                         | 7.44 (d, 7.2, 2H)                | 7.36       | 7.44, 7.28, 6.68                     |
| 8               | 128.7, CH         | 7.36 (dd, 7.5, 7.2, 2H)                           | 7.44, 7.28                       | 7.36       |                                      |
| 9               | 128.1, CH         | 7.28 (t, 7.5, 1H)                                 | 7.36                             | 7.44       |                                      |

<sup>a</sup> Measured at 150 MHz. <sup>b</sup> Carbon type established from <sup>13</sup>C DEPT and/or gHMQC experiments.

\*Overlapping with DMSO-*d*<sub>6</sub>

**Table S4. NMR Assignments for Acyclic Methyl Ester (2) in DMSO-*d*<sub>6</sub>**

| Structural Unit | Position          | <sup>13</sup> C <sup>a</sup> δ, type <sup>b</sup> | <sup>1</sup> H δ (m, J(Hz), int) | COSY              | gHMBC                        |
|-----------------|-------------------|---------------------------------------------------|----------------------------------|-------------------|------------------------------|
| Val-1           | O-CH <sub>3</sub> | 51.5, CH <sub>3</sub>                             | 3.61 (s, 3H)                     |                   |                              |
|                 | CO                | 171.7, qC                                         |                                  |                   | 4.11, 3.61, 2.04             |
|                 | α                 | 57.6, CH                                          | 4.11 (dd, 7.2, 6.6, 1H)          | 8.22, 2.04        | 8.22, 2.04, 0.90, 0.87       |
|                 | β                 | 29.6, CH                                          | 2.04 (ds, 7.2, 6.6, 1H)          | 0.90, 0.87        | 8.22, 4.11, 0.90, 0.87       |
|                 | α-CH <sub>3</sub> | 18.9, CH <sub>3</sub>                             | 0.87 (d, 7.2, 3H)                | 2.04              | 4.11, 2.04, 0.90             |
|                 | α-CH <sub>3</sub> | 18.4, CH <sub>3</sub>                             | 0.90 (d, 7.2, 3H)                | 2.04              | 4.11, 2.04, 0.87             |
|                 | NH                |                                                   | 8.22 (d, 7.2, 1H)                | 4.11              |                              |
| Ile-2           | CO                | 171.4, qC                                         |                                  |                   | 8.22, 4.30                   |
|                 | α                 | 56.2, CH                                          | 4.30 (dd, 9.0, 8.0, 1H)          | 7.88, 1.75        | 1.75, 1.38, 1.06, 0.83       |
|                 | β                 | 36.7, CH                                          | 1.75 (m, 1H)                     | 1.06, 0.83        | 4.30, 1.38, 1.06, 0.83, 0.80 |
|                 | γ                 | 24.0, CH <sub>2</sub>                             | 1.06 (m, 1H)                     | 1.75, 1.38, 0.80  | 4.30, 1.75, 0.83, 0.80       |
|                 |                   |                                                   | 1.38 (m, 1H)                     | 1.06, 0.80        |                              |
|                 | β-CH <sub>3</sub> | 15.1, CH <sub>3</sub>                             | 0.83 (d, 6.6, 3H)                | 1.75              | 4.30, 1.75, 1.38, 1.06       |
|                 | γ-CH <sub>3</sub> | 10.8, CH <sub>3</sub>                             | 0.80 (tr, 7.2, 3H)               | 1.38, 1.06        | 1.75, 1.38                   |
|                 | NH                |                                                   | 7.88 (d, 9.0, 1H)                | 4.30              |                              |
| Ala-3           | CO                | 172.0, qC                                         |                                  |                   | 7.88, 4.37, 1.19             |
|                 | α                 | 48.1, CH                                          | 4.37 (dq, 7.8, 7.2, 1H)          | 8.14, 1.19        | 8.14, 1.19                   |
|                 | α-CH <sub>3</sub> | 18.7, CH <sub>3</sub>                             | 1.19 (d, 7.2, 3H)                | 4.37              | 8.14, 4.37                   |
|                 |                   | NH                                                |                                  | 8.14 (d, 7.8, 1H) | 4.37                         |
| Val-4           | CO                | 170.7, qC                                         |                                  |                   | 8.14, 4.37, 4.18             |
|                 | α                 | 57.7, CH                                          | 4.18 (dd, 8.7, 6.9, 1H)          | 7.93, 1.92        | 7.93, 1.92, 0.79, 0.78       |
|                 | β                 | 30.3, CH                                          | 1.92 (ds, 7.2, 6.9, 1H)          | 4.18, 0.79, 0.78  | 7.93, 4.18, 0.79, 0.78       |
|                 | β-CH <sub>3</sub> | 19.1, CH <sub>3</sub>                             | 0.79 (d, 7.2, 3H)                | 1.92              | 4.18, 1.92, 0.78             |
|                 | β-CH <sub>3</sub> | 18.1, CH <sub>3</sub>                             | 0.78 (d, 7.2, 3H)                | 1.92              | 4.18, 1.92, 0.79             |
|                 |                   | NH                                                |                                  | 7.93 (d, 8.7, 1H) | 4.18                         |
| Hyppa-5         | 1                 | 170.1, qC                                         |                                  |                   | 7.93, 4.51, 4.18, 2.44       |
|                 | 2                 | 43.7, CH <sub>2</sub>                             | 2.44 (m, 2H)                     | 4.51              | 6.29, 4.51                   |
|                 | 3                 | 68.6, CH                                          | 4.51 (m, 1H)                     | 6.29, 5.25, 2.44  | 6.53, 6.29, 2.44             |
|                 | 4                 | 133.0, CH                                         | 6.29 (dd, 15.9, 6.0, 1H)         | 6.53, 4.51        | 6.53, 4.51, 2.44             |
|                 | 5                 | 128.3, CH                                         | 6.53 (d, 15.9, 1H)               | 6.29              | 7.38, 4.51                   |
|                 | 6                 | 136.7, qC                                         |                                  |                   | 7.32, 6.53, 6.29             |
|                 | 7                 | 126.2, CH                                         | 7.38 (d, 7.8, 2H)                | 7.32              | 7.38, 7.22, 6.53             |
|                 | 8                 | 128.5, CH                                         | 7.32 (dd, 7.8, 7.2, 2H)          | 7.38, 7.22        | 7.32                         |
|                 | 9                 | 127.3, CH                                         | 7.22 (t, 7.2, 1H)                | 7.32              | 7.38                         |
|                 |                   | OH                                                |                                  | 5.25 (d, 3.6, 1H) | 4.51                         |

<sup>a</sup> Measured at 150 MHz. <sup>b</sup> Carbon type established from <sup>13</sup>C DEPT and/or gHMQC experiments.
